# Supplementary material for: Synthesis and Characterization of Late Transition Metal Complexes of Mono-Acetate Pendant Armed Ethylene Cross-Bridged Tetraazamacrocycles with Promise as Oxidation Catalysts for Dye Bleaching
Source: MDPI journal article supplement (doi:10.3390/molecules28010232), 2022-12-27
Supplement: s1 [file s1]

# Synthesis and Characterization of Late Transition Metal Complexes of Mono-Acetate Pendant Armed Ethylene Cross-Bridged Tetraazamacrocycles with Promise as Oxidation Catalysts for Dye Bleaching

Tuyet Hoang <sup>1</sup>, Somrita Mondal <sup>1</sup>, Michael B. Allen <sup>1</sup>, Leslie Garcia <sup>1</sup>, Jeanette A. Krause <sup>2</sup>, Allen G. Oliver <sup>3</sup>, Timothy J. Prior <sup>4</sup>, and Timothy J. Hubin <sup>1,\*</sup>

## Supplementary Information

| <b>Table of Contents</b>                                                                                                                                     | <b>Page</b> |
|--------------------------------------------------------------------------------------------------------------------------------------------------------------|-------------|
| 1. Figures S1-S8. <sup>1</sup> H and <sup>13</sup> C NMR Spectra of <b>L</b> <sub>1</sub> and <b>L</b> <sub>2</sub> ligands and precursors and Zn complexes. | 2-9         |
| 2. Figures S9-S18. Cyclic Voltammograms of <b>L</b> <sub>1</sub> and <b>L</b> <sub>2</sub> Metal Complexes                                                   | 10-14       |
| 3. Figure S19. Example: kinetics of dissociation plots at 40 °C in 1 M HClO <sub>4</sub> for [Cu <b>L</b> <sub>1</sub> ]                                     | 15          |
| 4. Figures S20-S31. Plots of A <sub>t</sub> /A <sub>0</sub> vs time for dye bleaching by Fe and Mn catalysts.                                                | 16 – 21     |
| 5. Tables S1-S7. X-Ray Crystallography for [Co <b>L</b> <sub>1</sub> Cl]PF <sub>6</sub>                                                                      | 22-28       |
| 6. Tables S8-S14. X-Ray Crystallography for [Cu <b>L</b> <sub>1</sub> ]PF <sub>6</sub>                                                                       | 29-34       |
| 7. Tables S15-S21. X-Ray Crystallography for [Co <b>L</b> <sub>2</sub> Cl]PF <sub>6</sub>                                                                    | 35-40       |
| 8. Tables S22-S28. X-Ray Crystallography for [Cu <b>L</b> <sub>2</sub> ]PF <sub>6</sub>                                                                      | 41-46       |

Figure S1. a)  $^1\text{H}$  NMR (a) and  $^{13}\text{C}$  NMR (b) spectra for **B<sub>1</sub>**.

PROTON

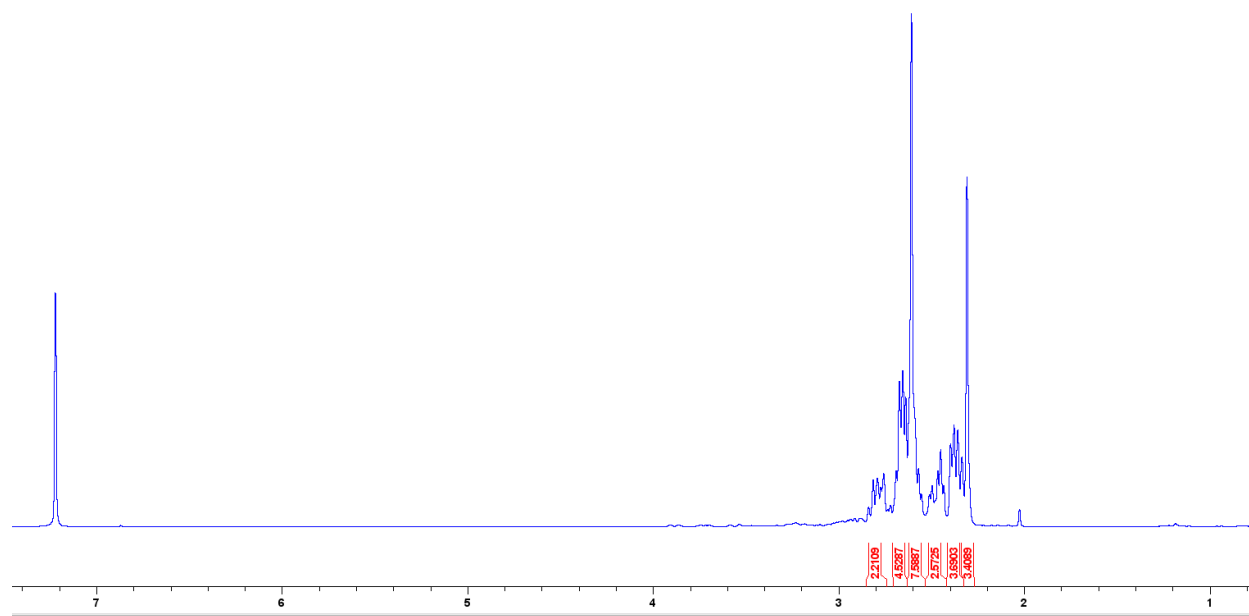

(a)

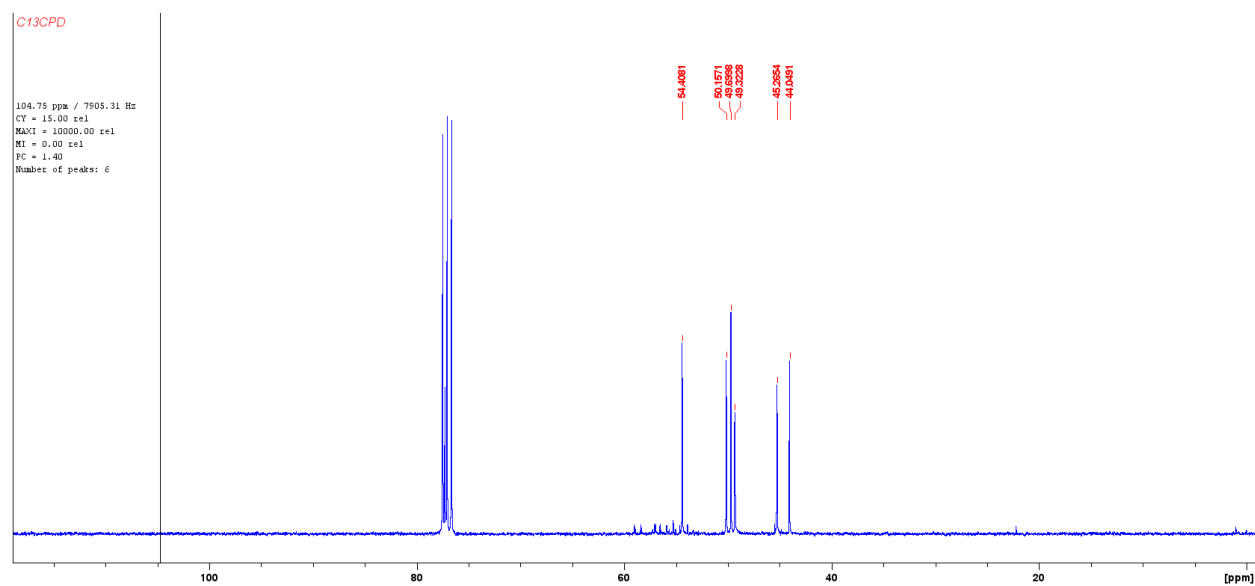

(b)

Figure S2. a)  $^1\text{H}$  NMR (a) and  $^{13}\text{C}$  NMR (b) spectra for **C<sub>1</sub>**.  $^{13}\text{C}$  NOT CLEAN; ???

Tuyet never ran NMR's. TJH found TH123 which is the right compound and is taking NMR's right now

(a)

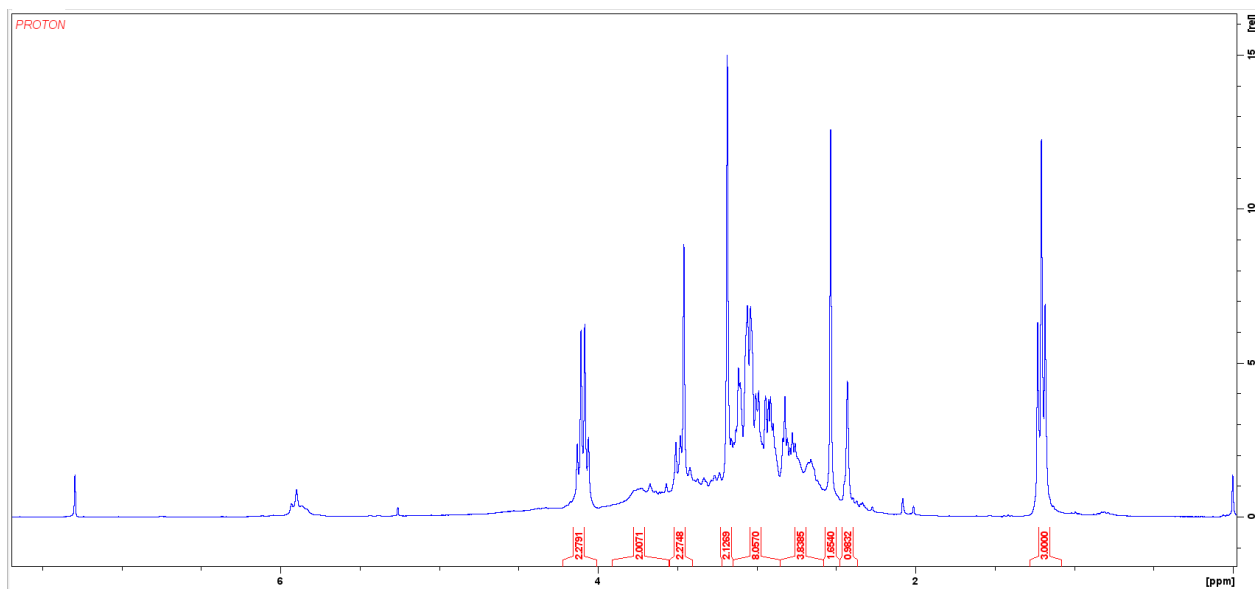

(b)

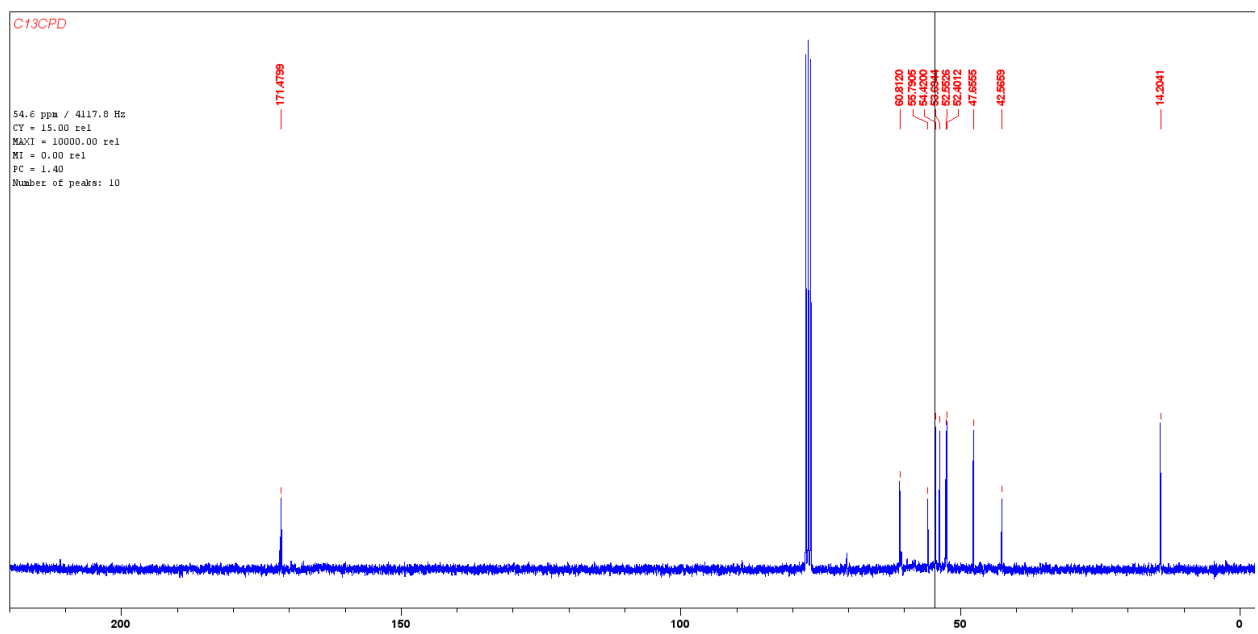

Figure S3. a)  $^1\text{H}$  NMR (a) and  $^{13}\text{C}$  NMR (b) spectra for  $\text{L}_1$ .

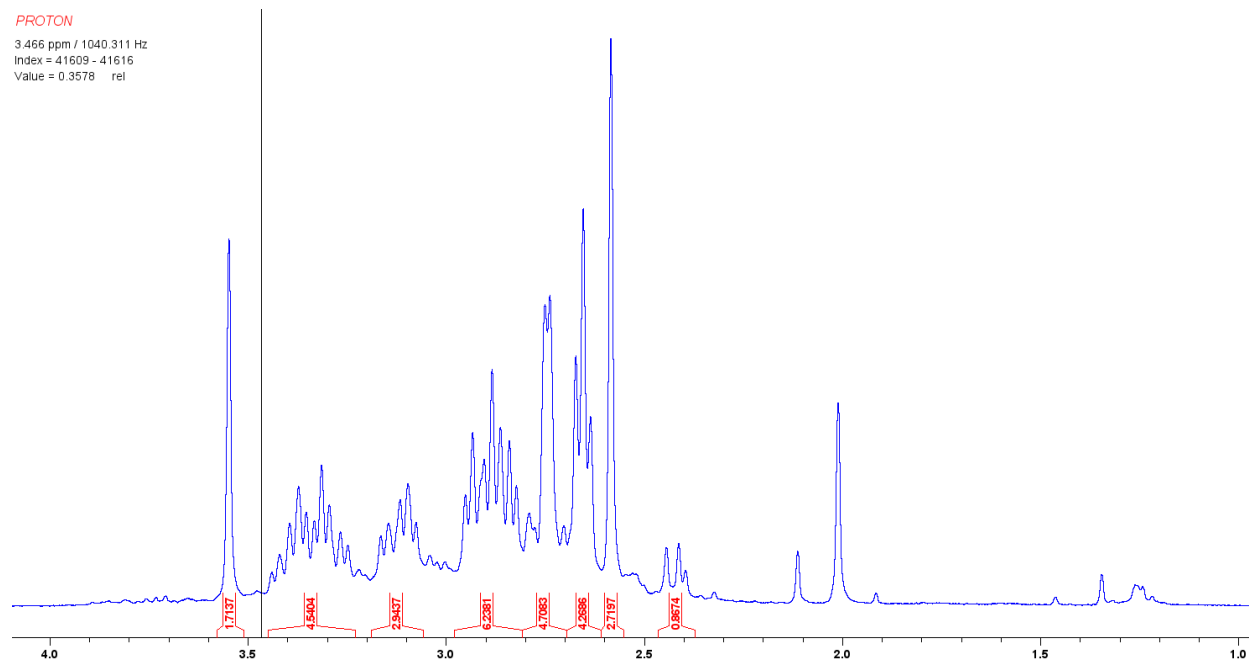

(a)

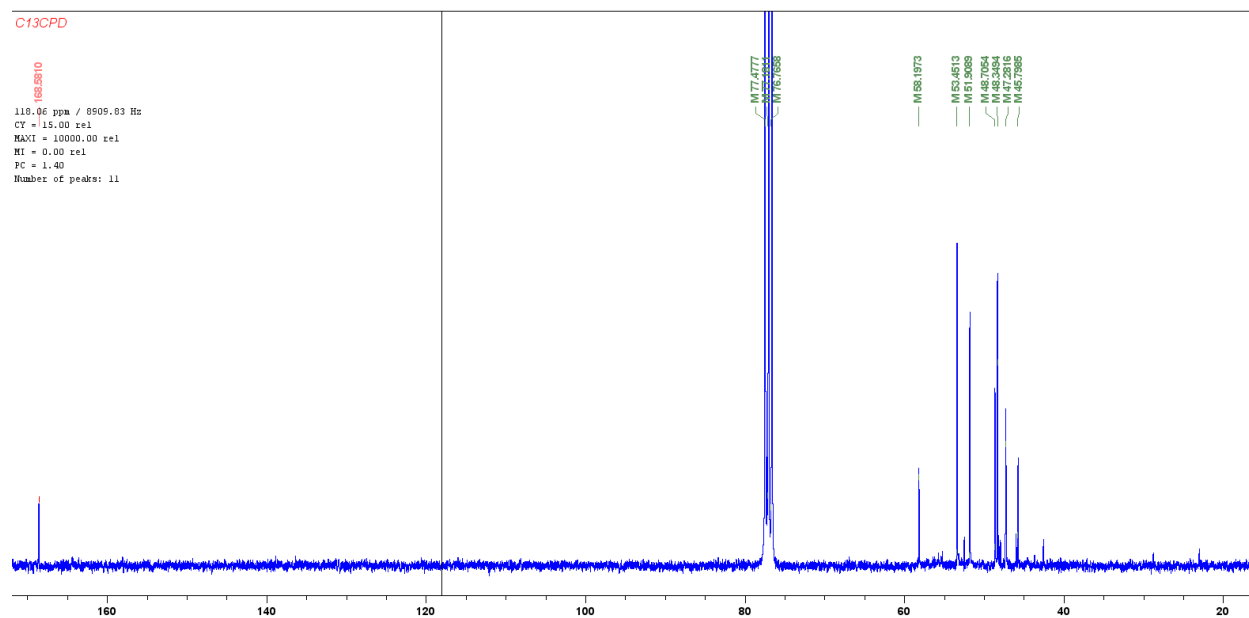

(b)

Figure S4. a)  $^1\text{H}$  NMR (a) and  $^{13}\text{C}$  NMR (b) spectra for **B<sub>2</sub>**. This is a known compound [“MRI image enhancement compositions containing tetraazabicyclohexadecane manganese complexes” Perkins, Christopher Mark; Kitko, David Jonathan. World Intellectual Property Organization, WO2002026267 A2 2002-04-04], [“Copper(II) and zinc(II) complexation with N-ethylene hydroxycyclams and consequences on the macrocyclic backbone configuration” AlHaddad, Nancy; Lelong, Evan; Suh, Jong-Min; Cordier, Marie; Lim, Mi Hee; Royal, Guy; Platas-Iglesias, Carlos; Bernard, Helene; Tripier, Raphael Dalton Transactions (2022), 51(22), 8640-8656]

(a)

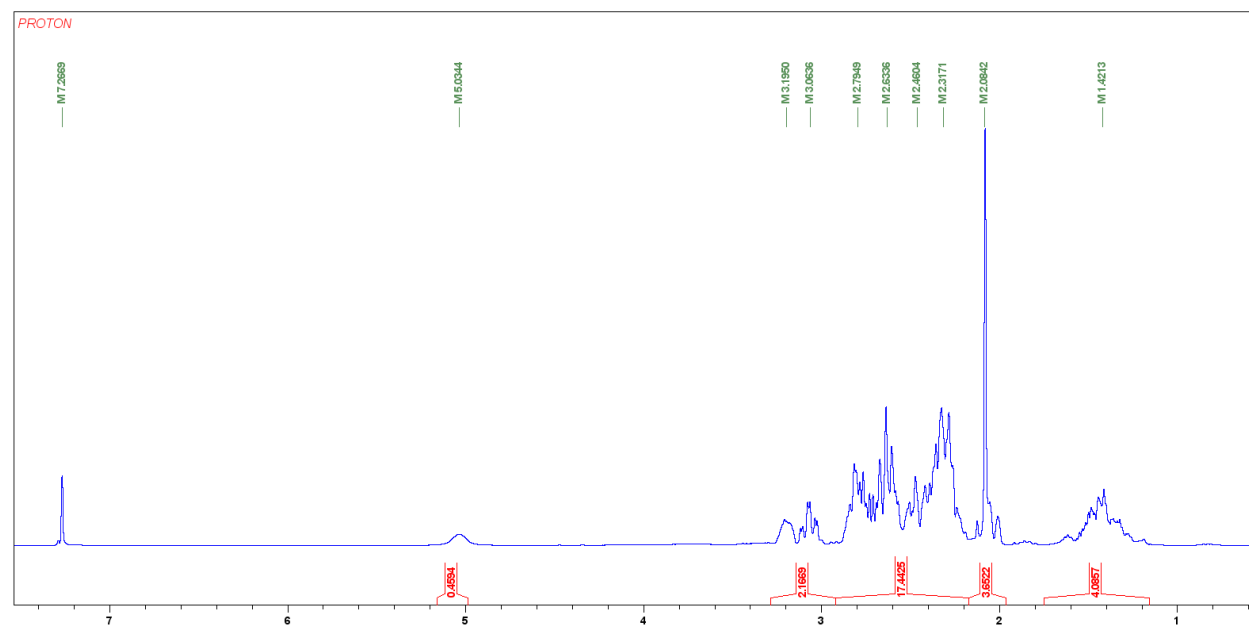

(b)

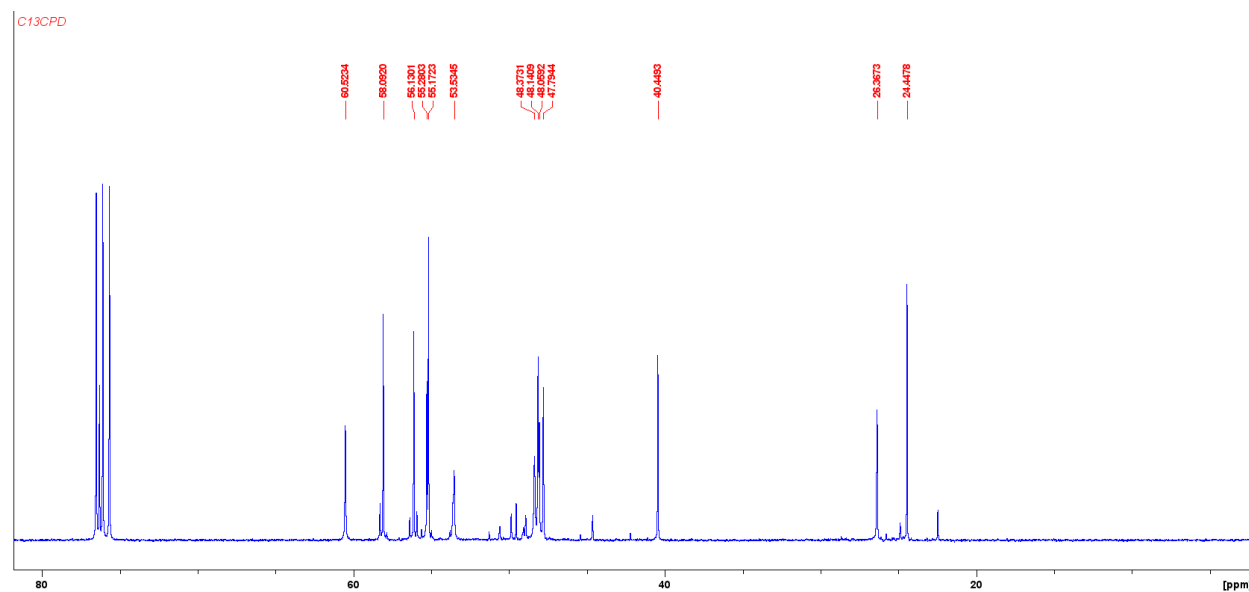

(a)

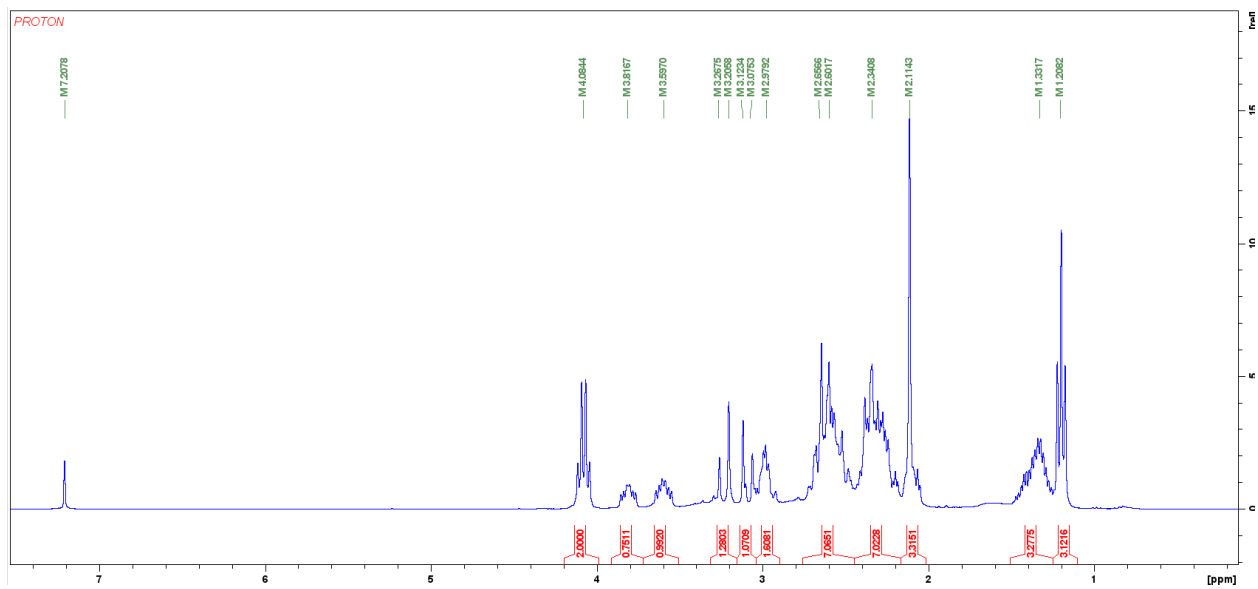

(b)

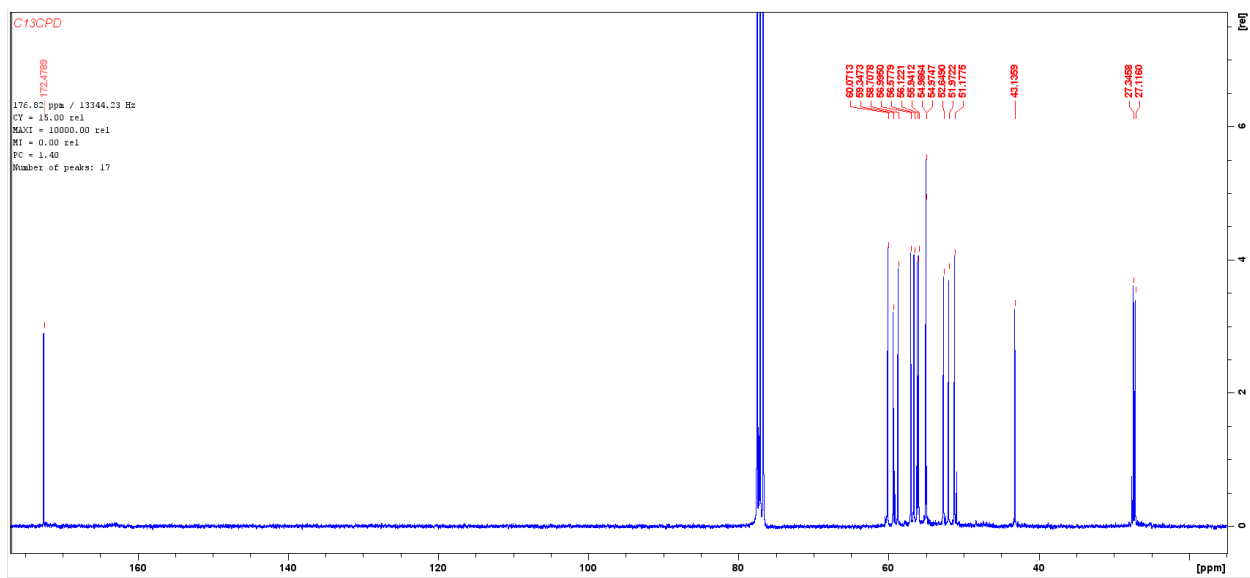

Figure S6. a)  $^1\text{H}$  NMR (a) and  $^{13}\text{C}$  NMR (b) spectra for  $\text{L}_2$ .

(a)

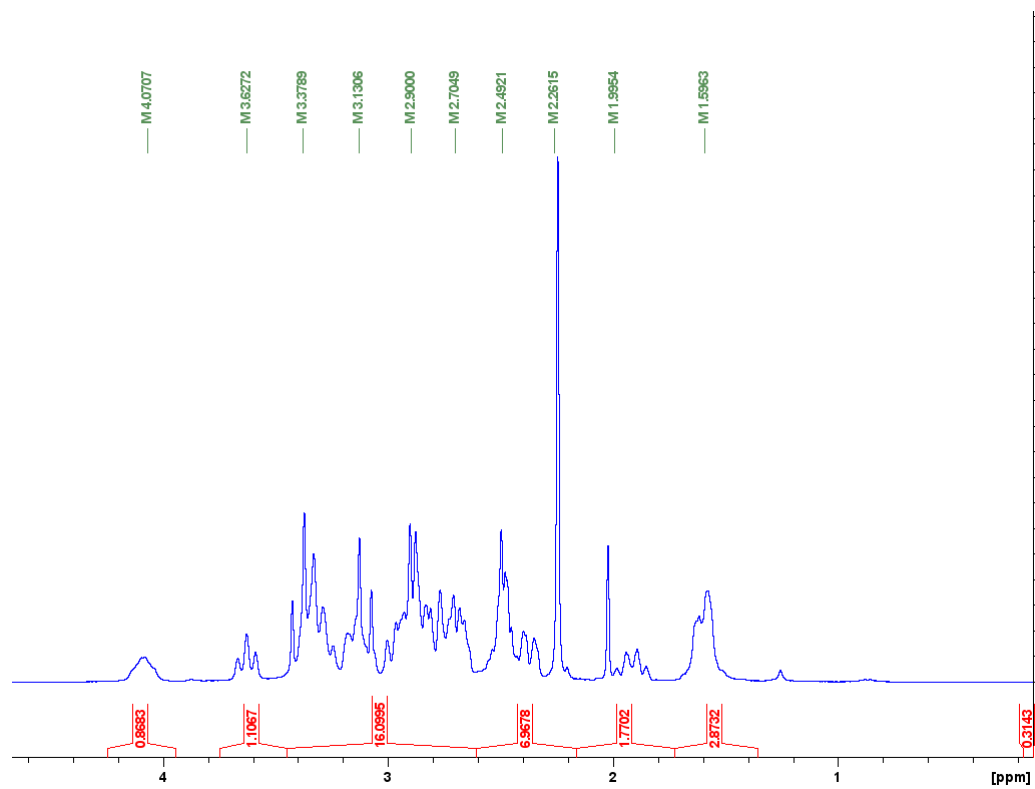

(b)

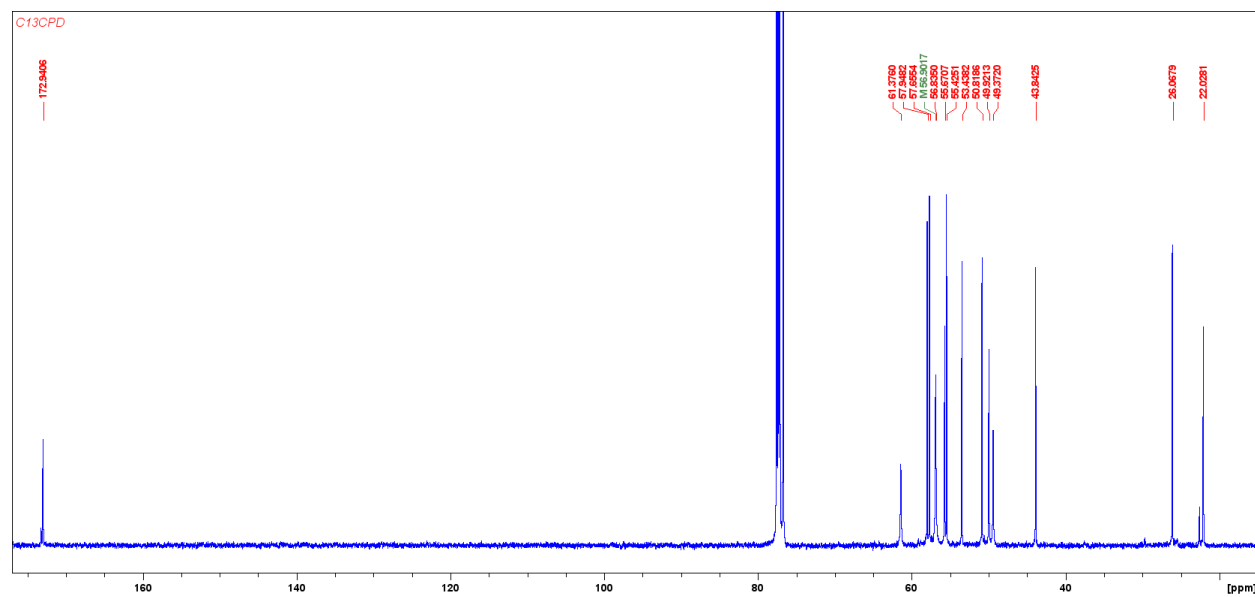

Figure S7. a)  $^1\text{H}$  NMR (a) and  $^{13}\text{C}$  NMR (b) spectra for  $\text{L}_1\text{ZnClPF}_6$ .

(a)

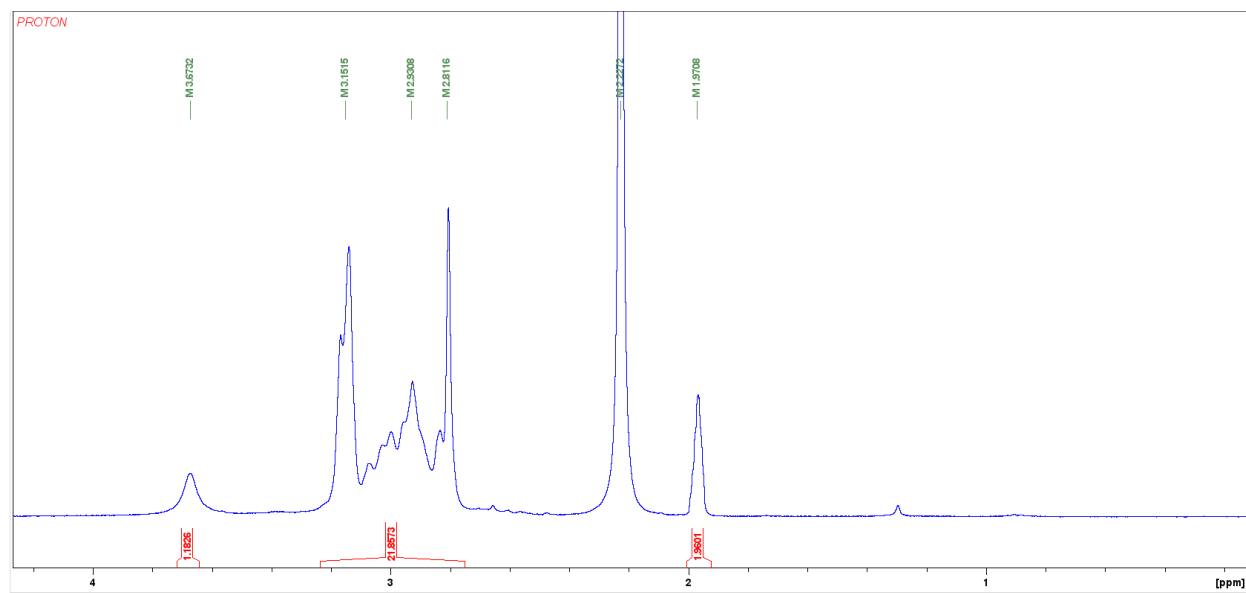

(b)

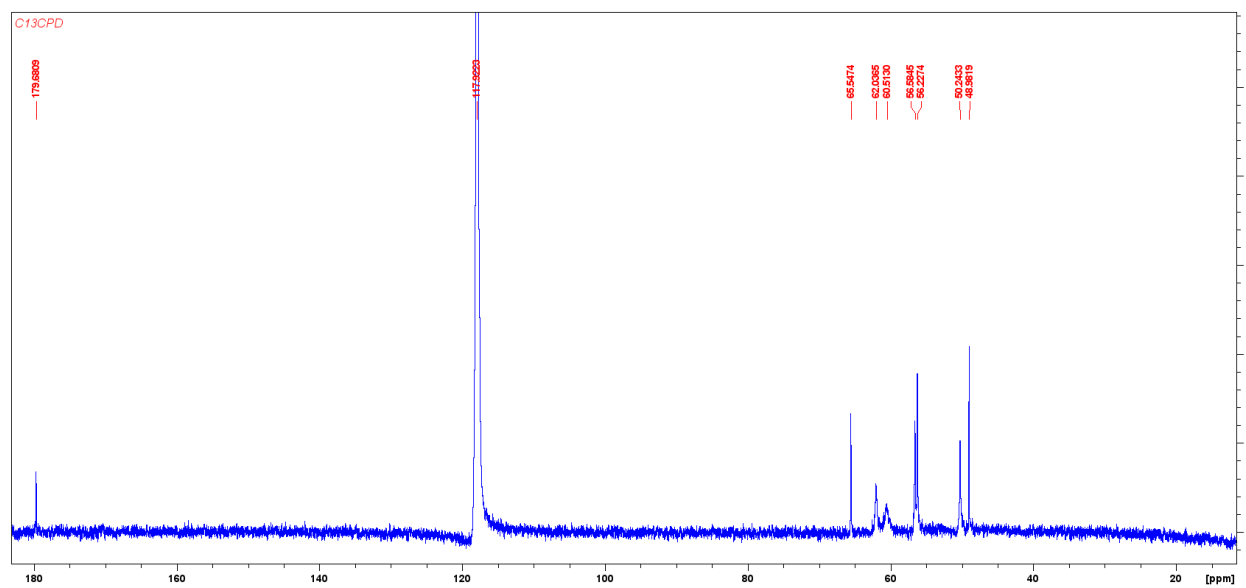



Figure S8. a)  $^1\text{H}$  NMR (a) and  $^{13}\text{C}$  NMR (b) spectra for  $\text{L}_2\text{ZnClPF}_6$ .

(a)

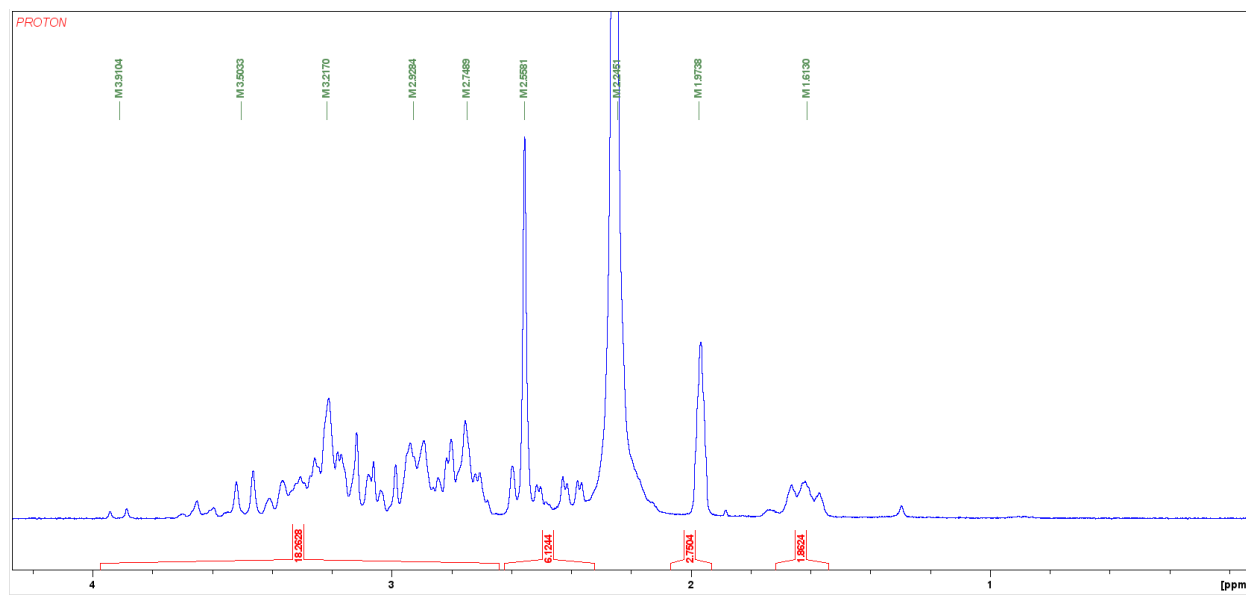

(b)

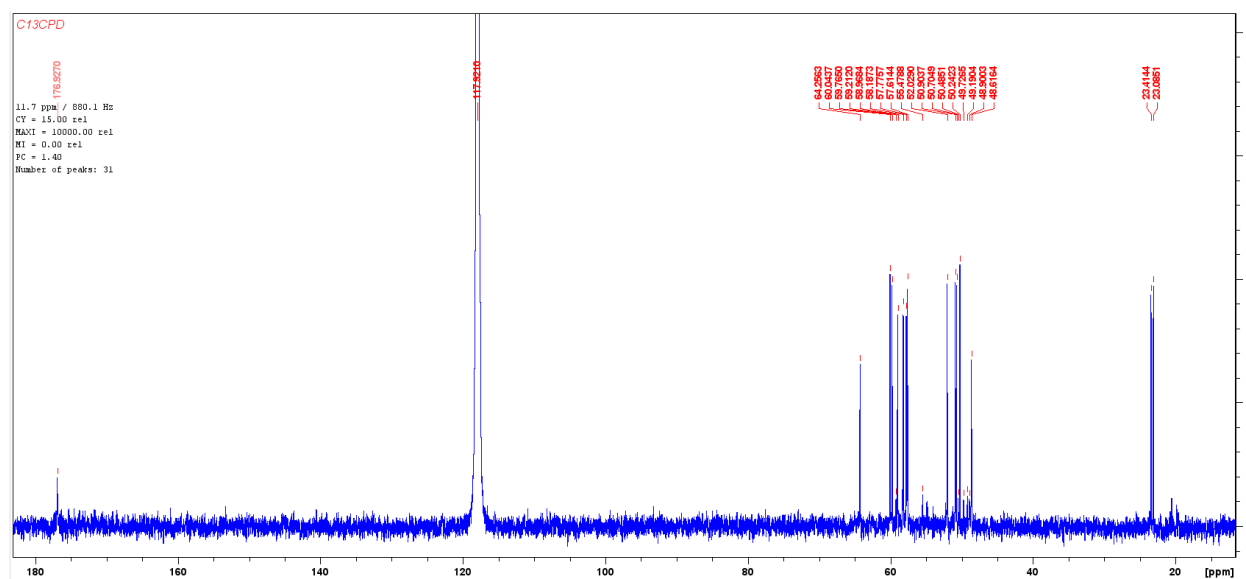

Figure S9. Cyclic Voltammogram in Acetonitrile for MnL1

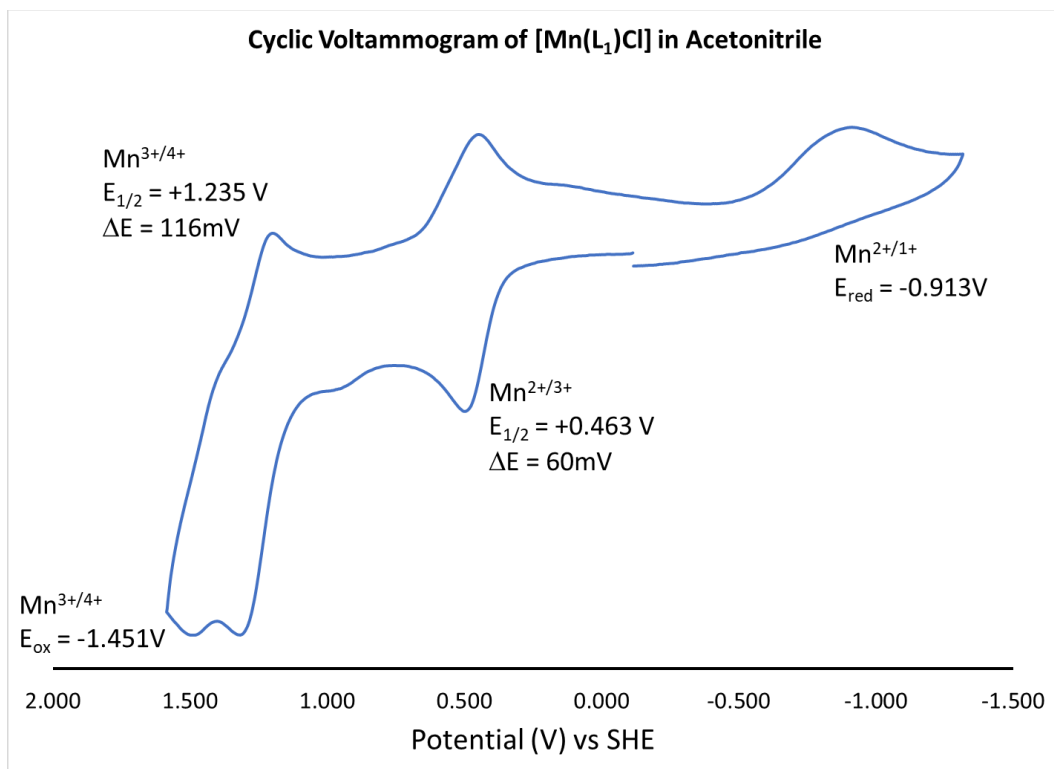

Figure S10. Cyclic Voltammogram in Acetonitrile for FeL1

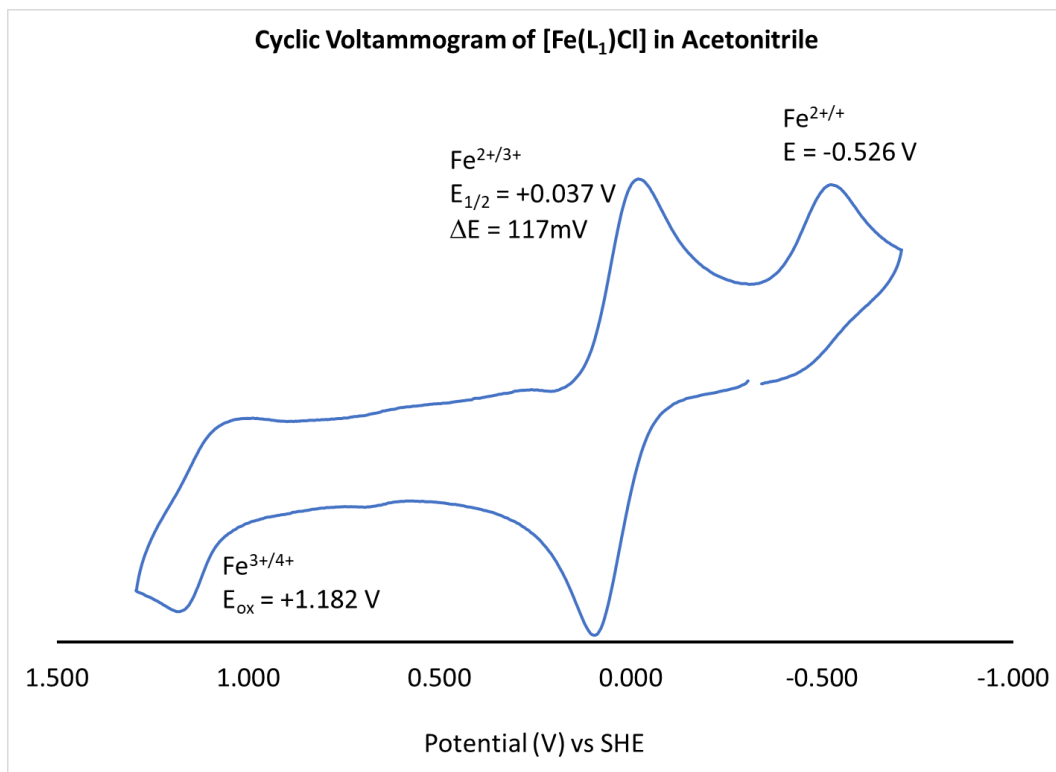

Figure S11. Cyclic Voltammogram in Acetonitrile for CoL1

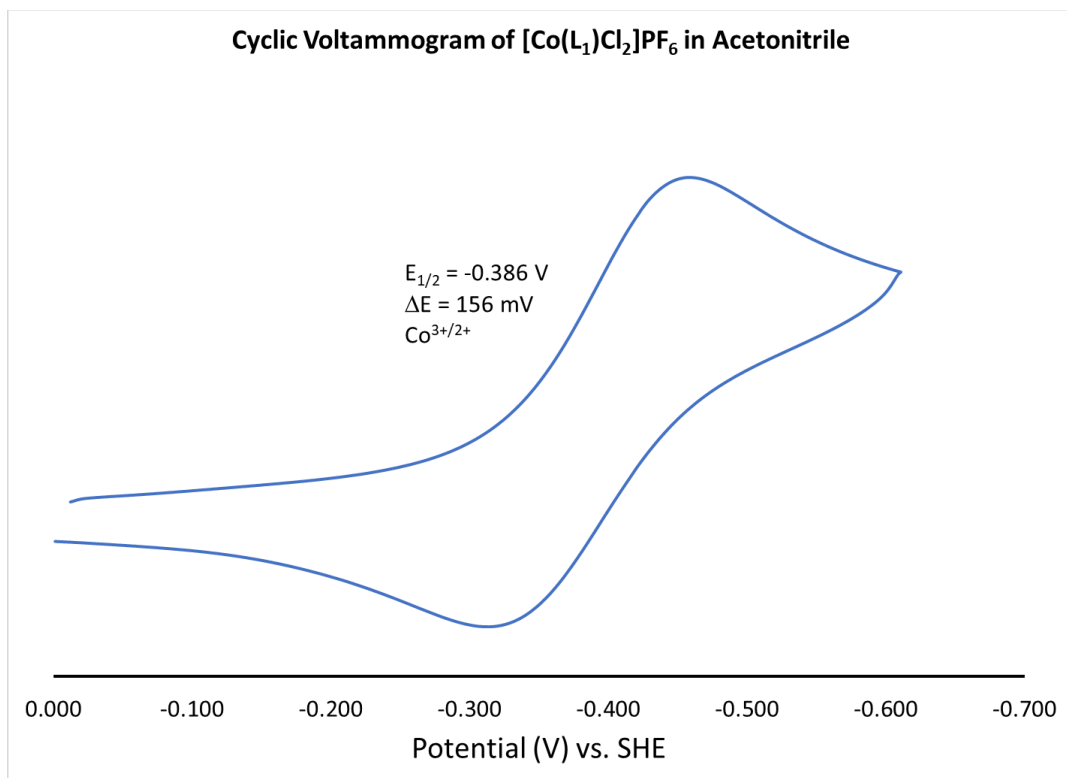

Figure S12. Cyclic Voltammogram in Acetonitrile for NiL1

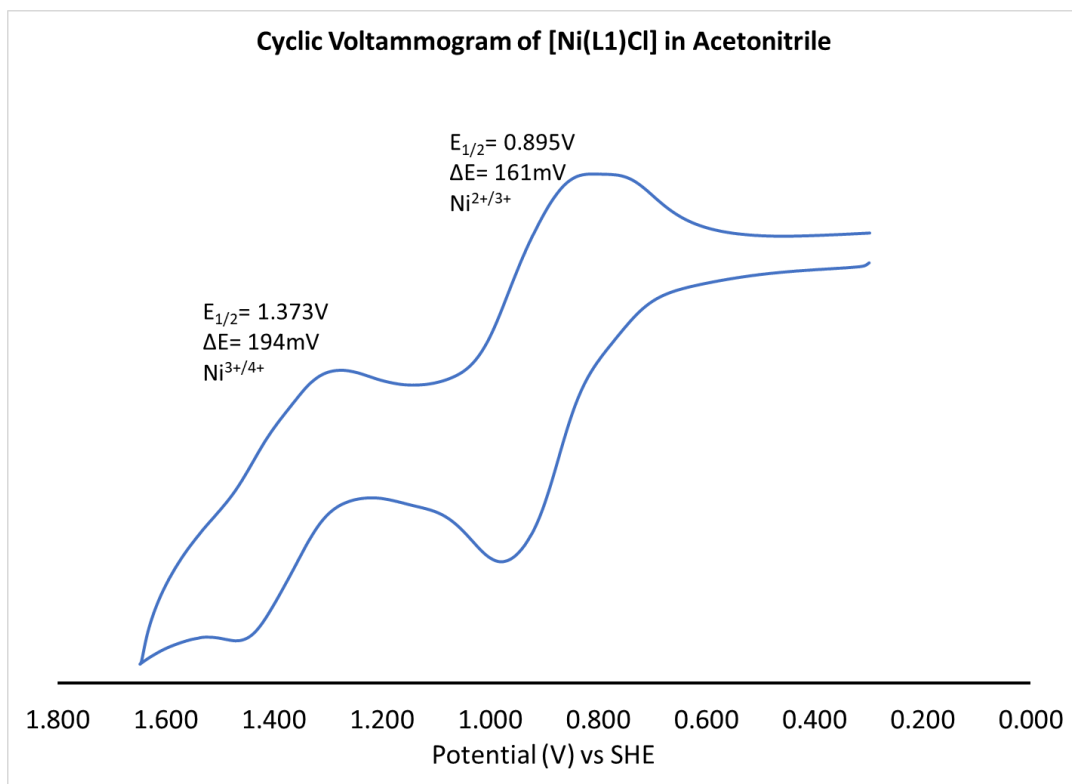

Figure S13. Cyclic Voltammogram in Acetonitrile for CuL1

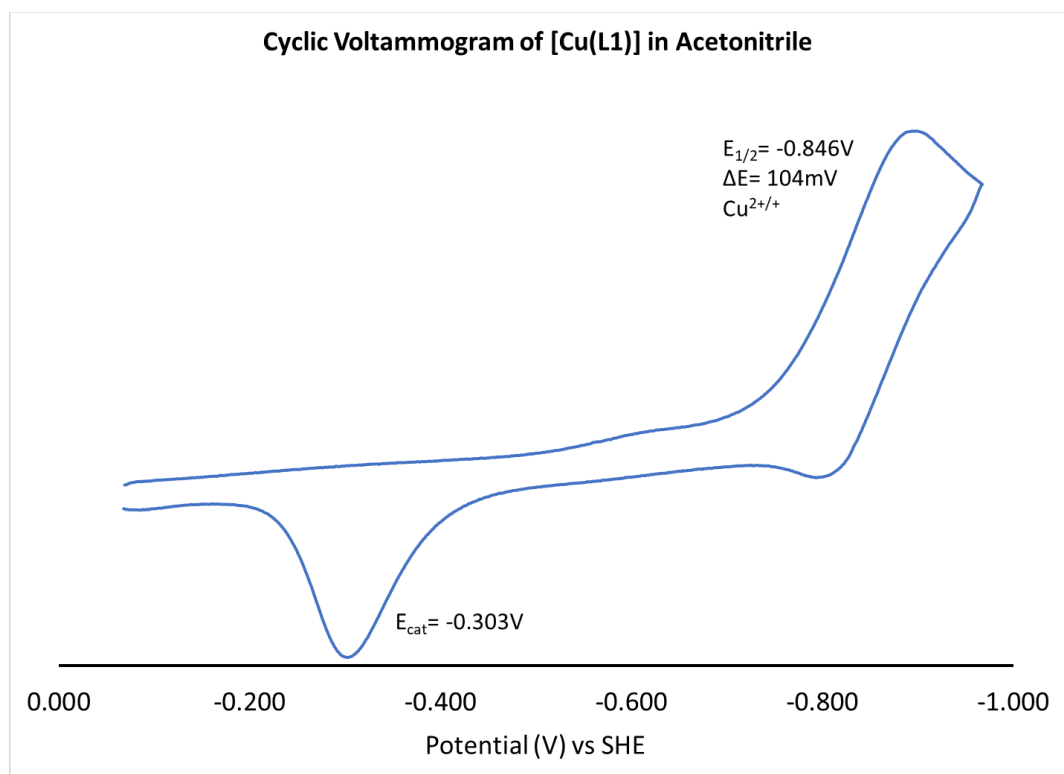

Figure S14. Cyclic Voltammogram in Acetonitrile for MnL2

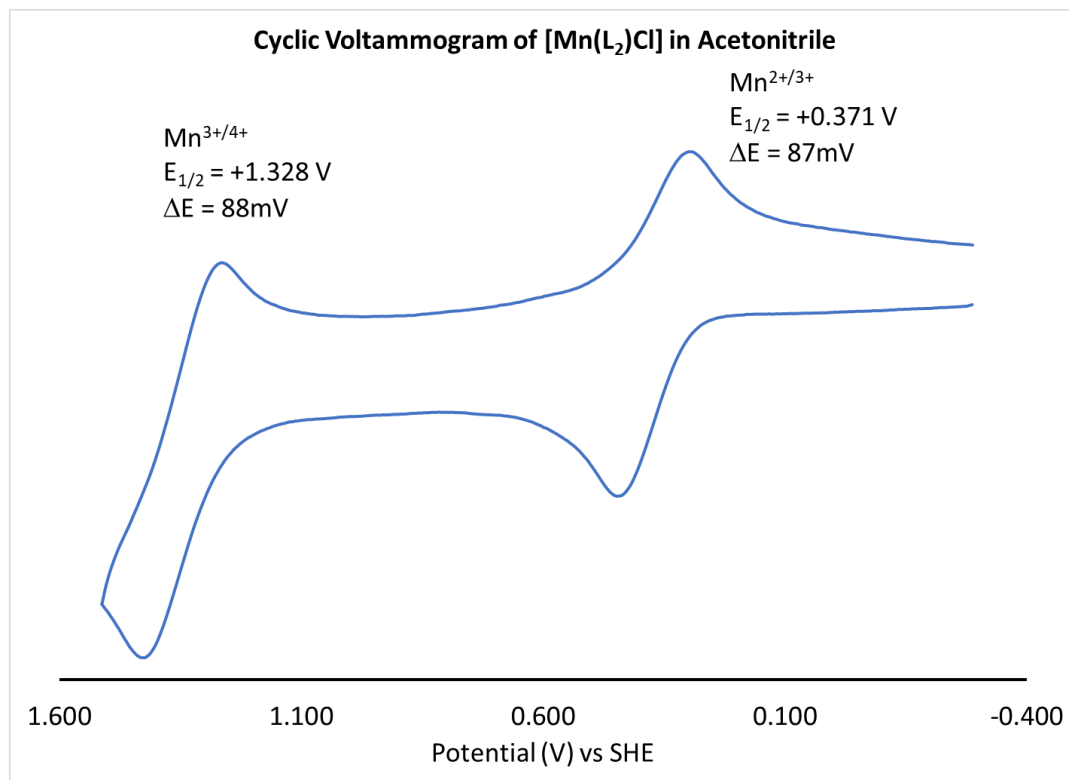

Figure S15. Cyclic Voltammogram in Acetonitrile for FeL2

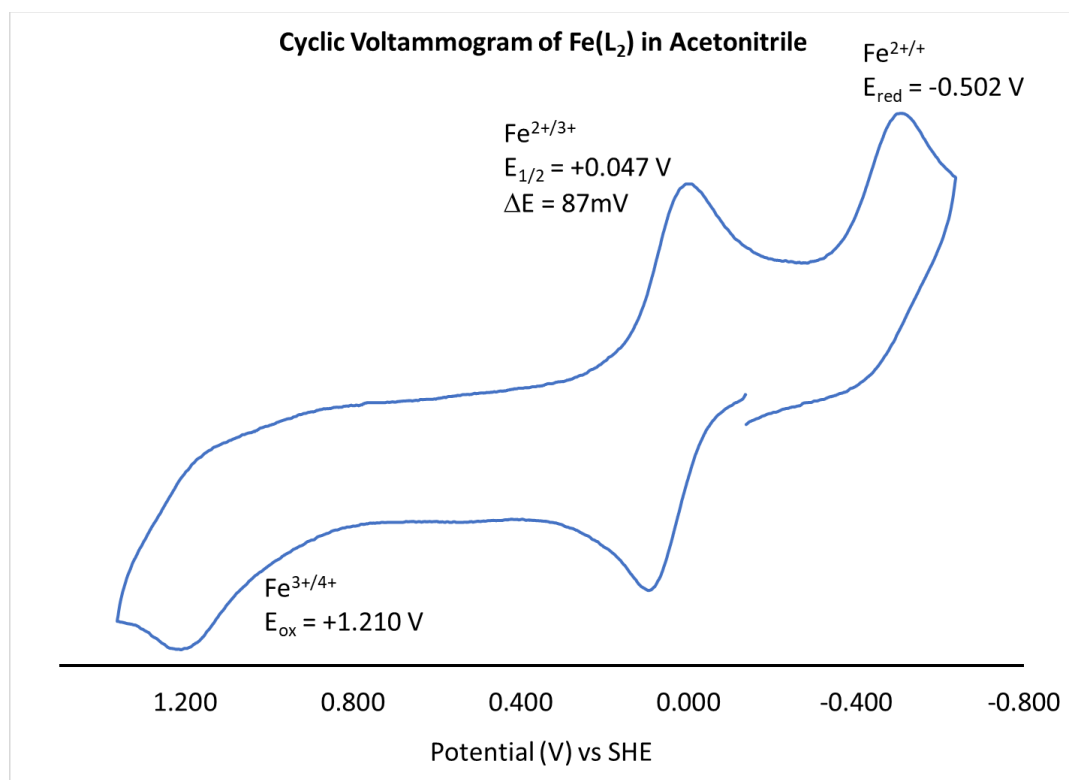

Figure S16. Cyclic Voltammogram in Acetonitrile for CoL2

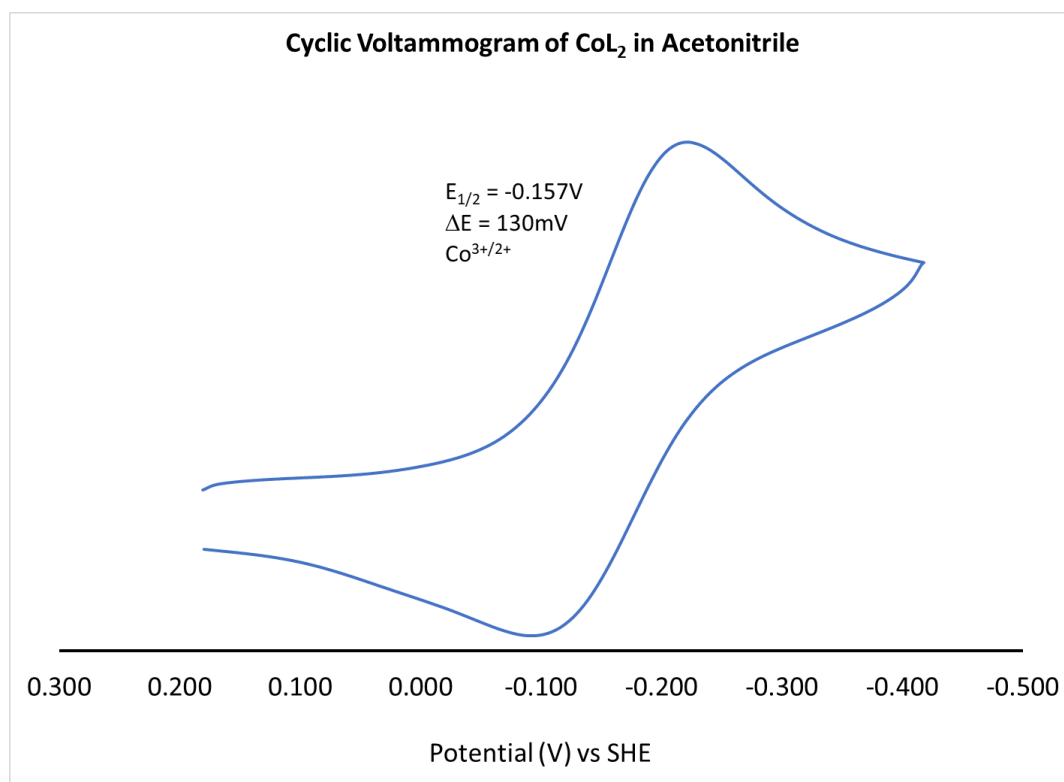

Figure S17. Cyclic Voltammogram in Acetonitrile for NiL2

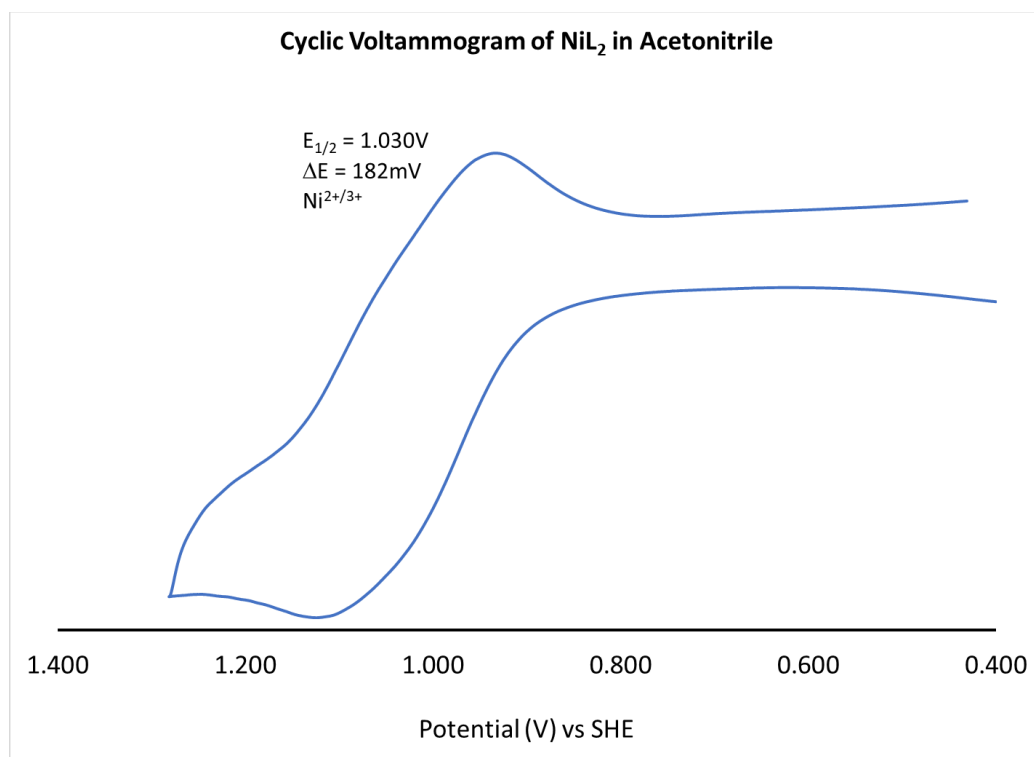

Figure S18. Cyclic Voltammogram in Acetonitrile for CuL2

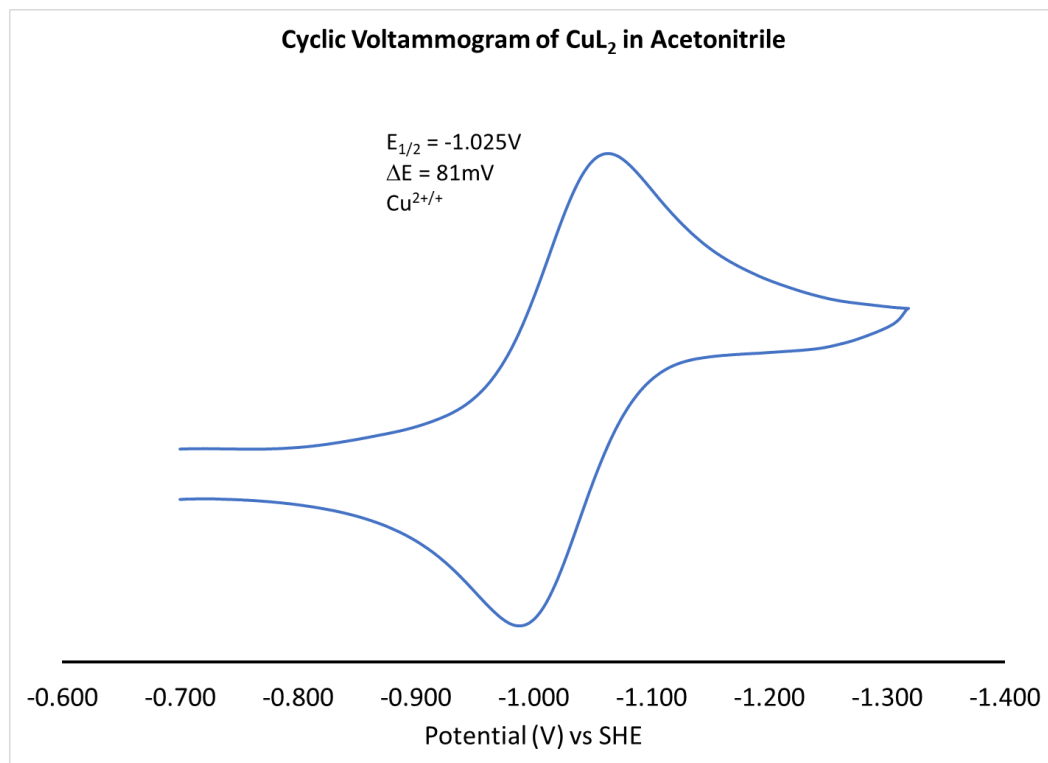

Figure S19. Kinetics of dissociation plots at 40 °C in 1 M HClO<sub>4</sub> for [CuL<sub>1</sub>]

(a) Individual UV-Vis Spectra at 2-hour intervals

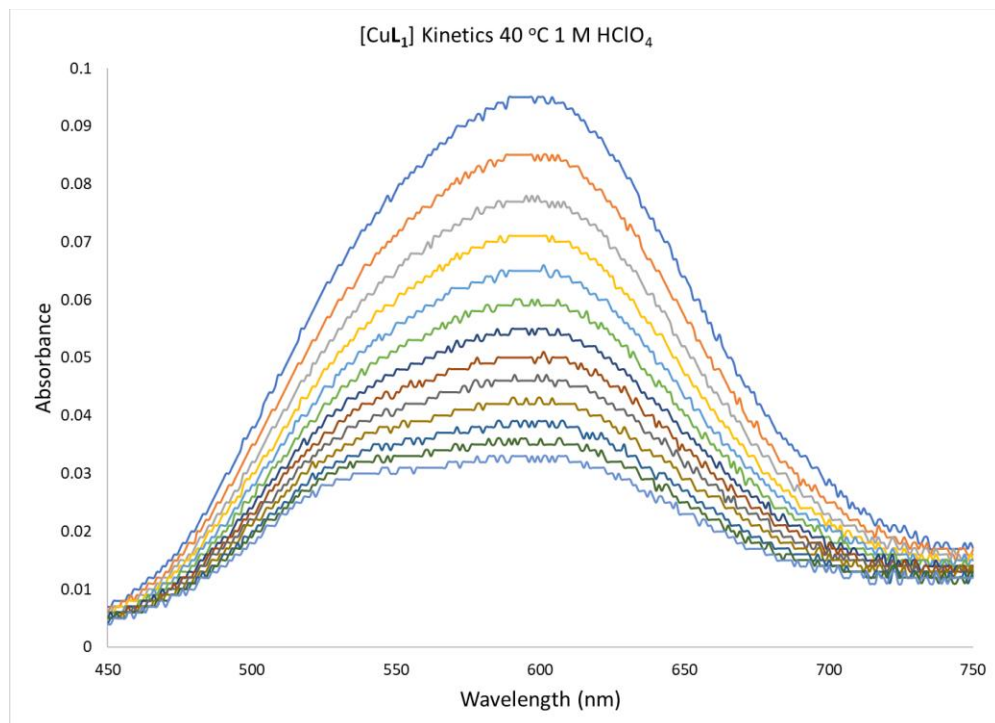

(b) Plot of lnA vs t to Determine Half-Life

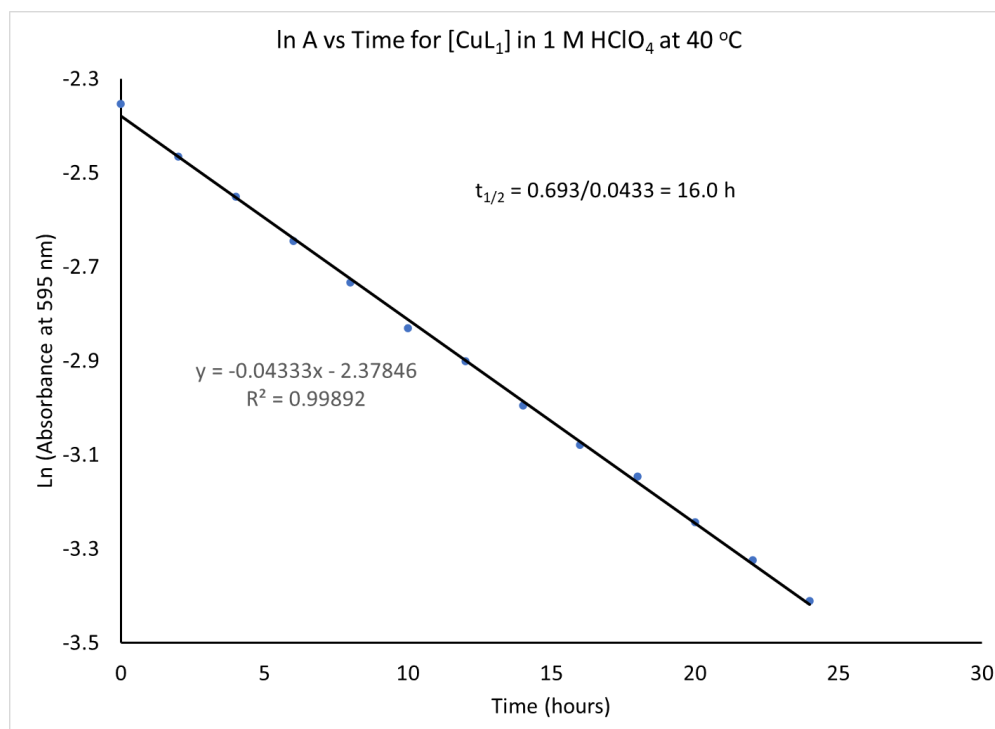

Figure S20. Plot of  $A_t/A_0$  vs time for degradation of Methylene Blue by Fe-L1 complex

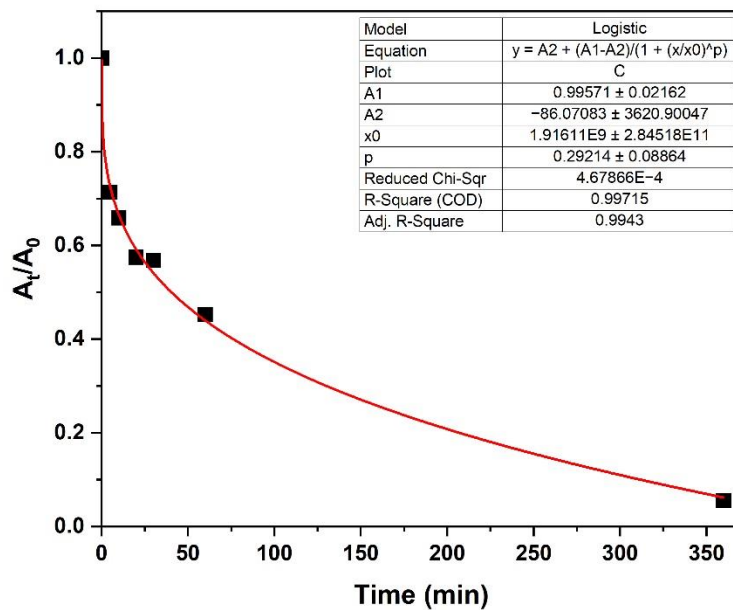

Figure S21. Plot of  $A_t/A_0$  vs time for degradation of Methylene Blue by Fe-L2 complex

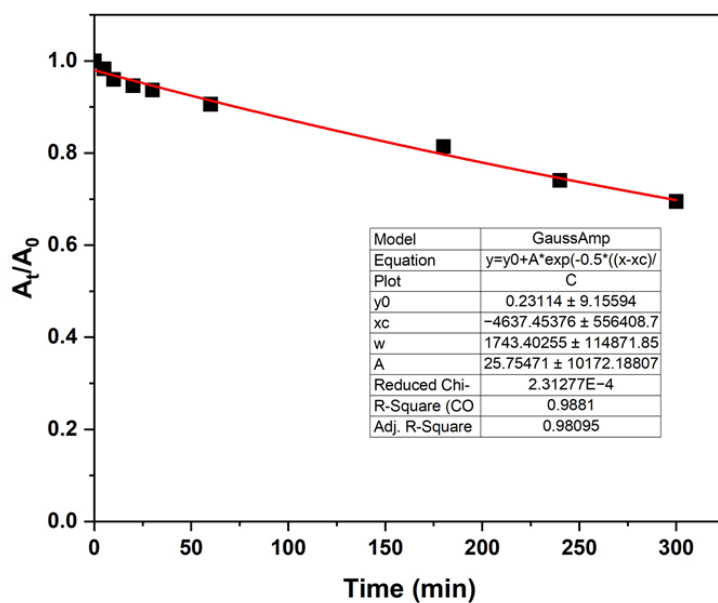



Figure S22. Plot of  $A_t/A_0$  vs time for degradation of Methylene Blue by Mn-L1 complex

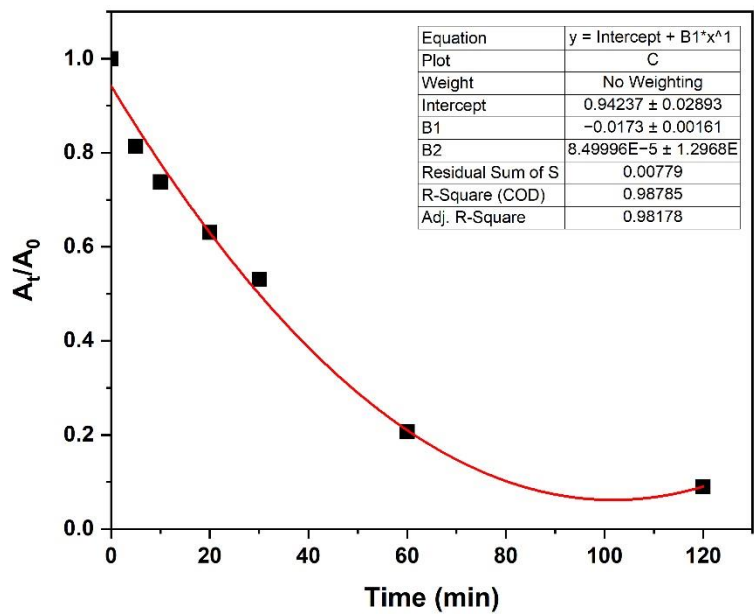

Figure S23. Plot of  $A_t/A_0$  vs time for degradation of Methylene Blue by Mn-L2 complex

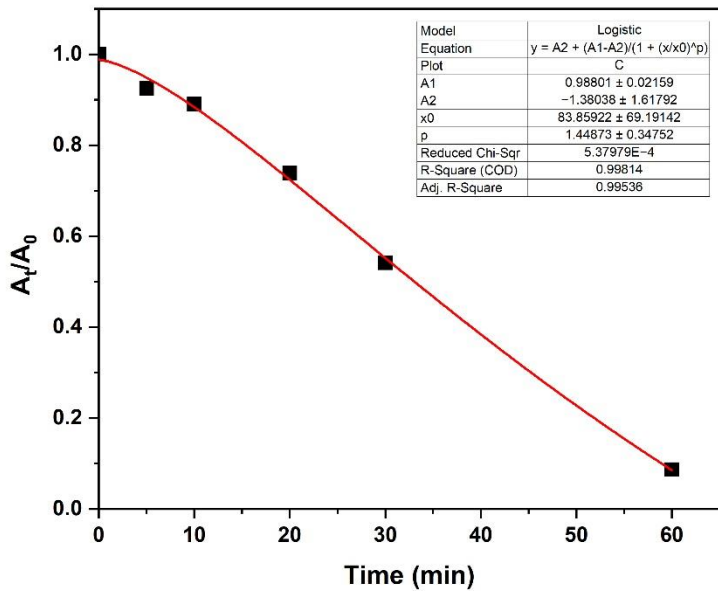

Figure S24. Plot of  $A_t/A_0$  vs time for degradation of Methyl Orange by Fe-L1 complex

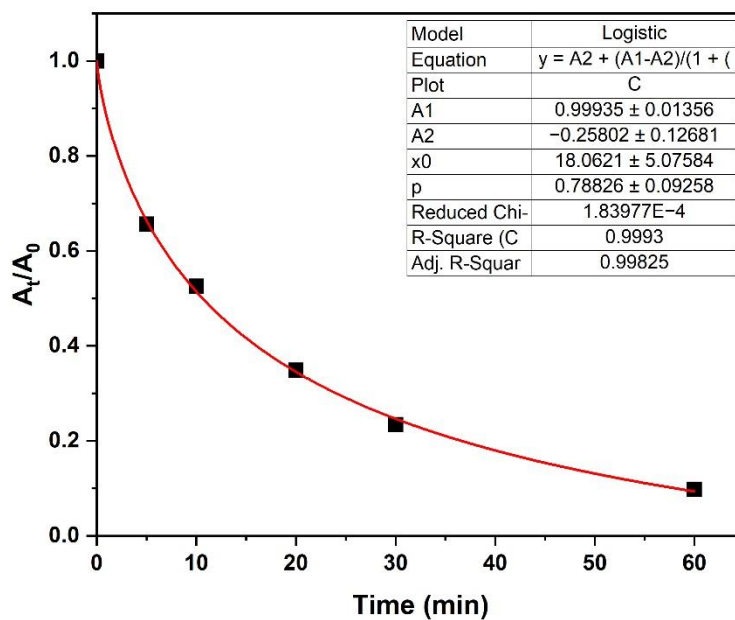

Figure S25. Plot of  $A_t/A_0$  vs time for degradation of Methyl Orange by Fe-L2 complex

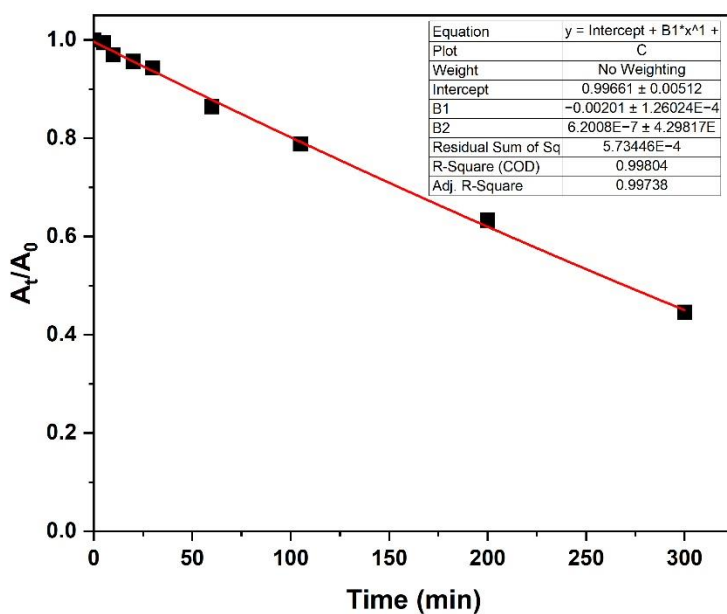

Figure S26. Plot of  $A_t/A_0$  vs time for degradation of Methyl Orange by Mn-L1 complex

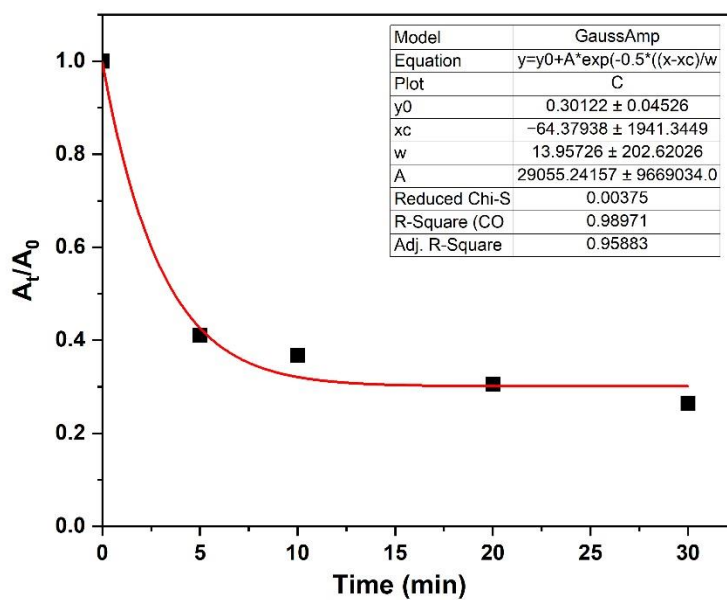

Figure S27. Plot of  $A_t/A_0$  vs time for degradation of Methyl Orange by Mn-L2 complex

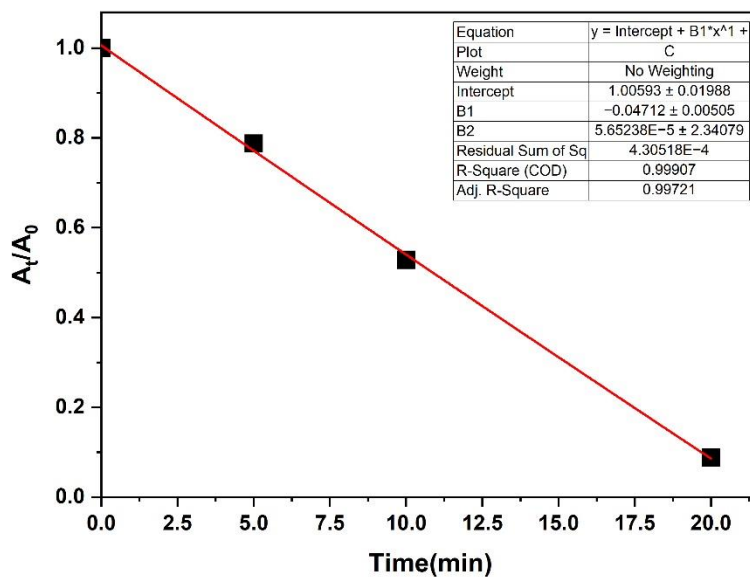

Figure S28. Plot of  $A_t/A_0$  vs time for degradation of Rhodamine B by Fe-L1 complex

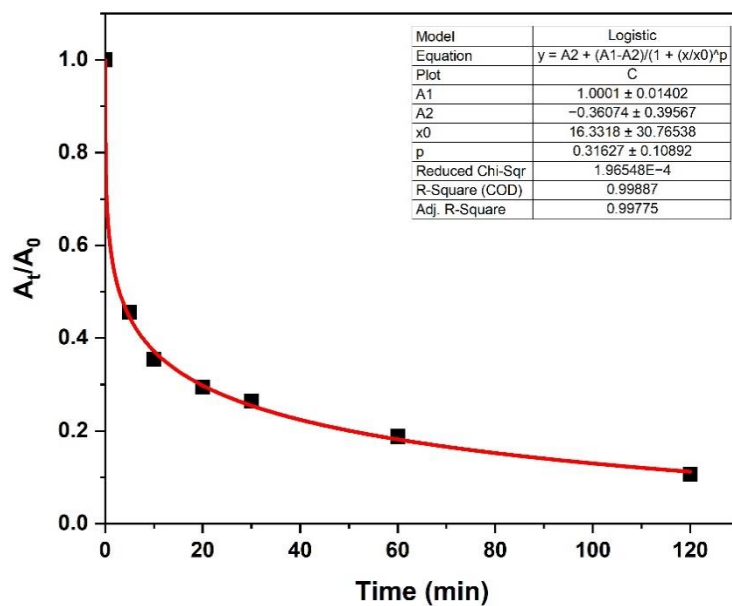

Figure S29. Plot of  $A_t/A_0$  vs time for degradation of Rhodamine B by Fe-L2 complex

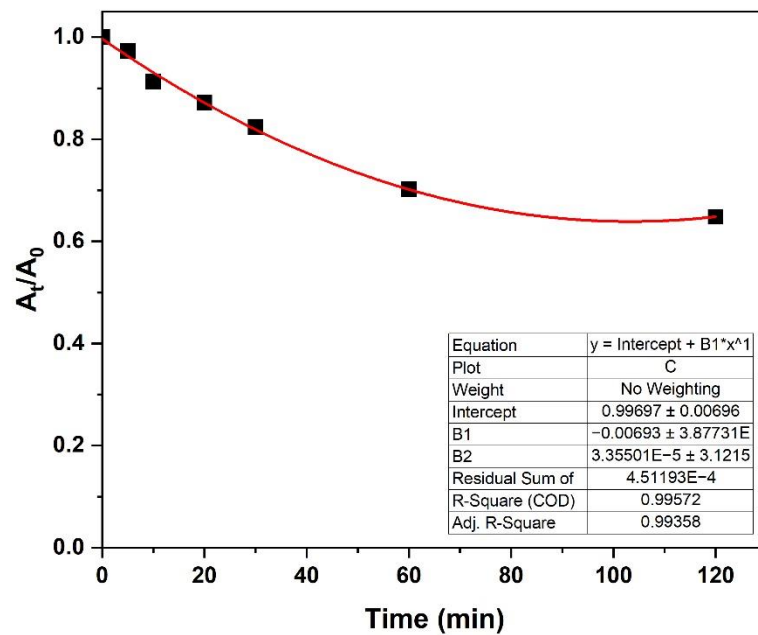

Figure S30. Plot of  $A_t/A_0$  vs time for degradation of Rhodamine B by Mn-L1 complex

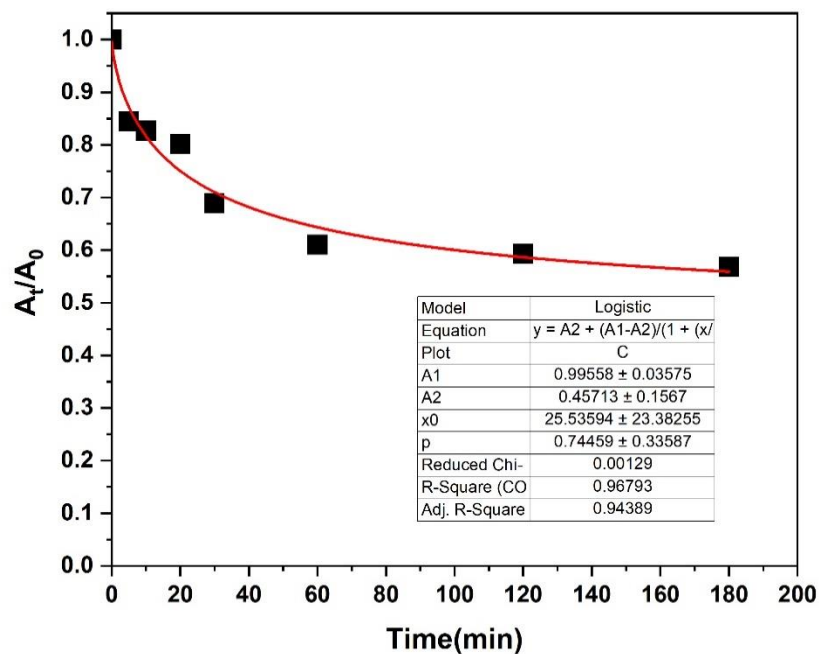

Figure S31. Plot of  $A_t/A_0$  vs time for degradation of Rhodamine B by Mn-L2 complex

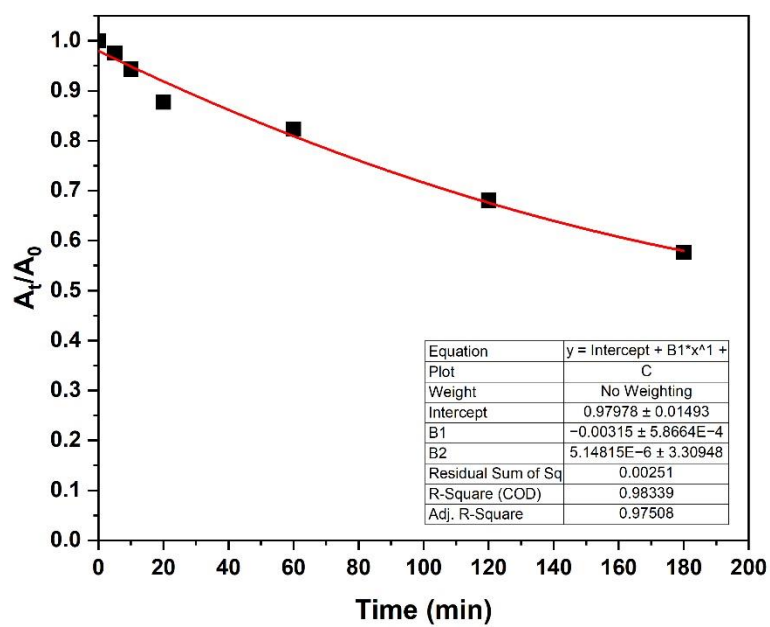

**Table S1. Crystal data and structure refinement for [CoL<sub>1</sub>Cl]PF<sub>6</sub>..**

|                                             |                                                                                     |
|---------------------------------------------|-------------------------------------------------------------------------------------|
| Identification code                         | th68bp21n                                                                           |
| Empirical formula                           | C <sub>13</sub> H <sub>25</sub> ClCoF <sub>6</sub> N <sub>4</sub> O <sub>2</sub> P  |
| Structural formula                          | C <sub>13</sub> H <sub>25</sub> N <sub>4</sub> O <sub>2</sub> CoCl, PF <sub>6</sub> |
| Formula weight                              | 508.72                                                                              |
| Temperature/K                               | 127                                                                                 |
| Crystal system                              | monoclinic                                                                          |
| Space group                                 | P2 <sub>1</sub> /n                                                                  |
| a/Å                                         | 7.9000(2)                                                                           |
| b/Å                                         | 19.3699(5)                                                                          |
| c/Å                                         | 12.2722(3)                                                                          |
| α/°                                         | 90                                                                                  |
| β/°                                         | 98.2620(10)                                                                         |
| γ/°                                         | 90                                                                                  |
| Volume/Å <sup>3</sup>                       | 1858.43(8)                                                                          |
| Z                                           | 4                                                                                   |
| ρ <sub>calc</sub> /g/cm <sup>3</sup>        | 1.818                                                                               |
| μ/mm <sup>-1</sup>                          | 1.230                                                                               |
| F(000)                                      | 1040.0                                                                              |
| Crystal size/mm <sup>3</sup>                | 0.325 × 0.098 × 0.035                                                               |
| Radiation                                   | MoKα (λ = 0.71073Å)                                                                 |
| 2θ range for data collection/°              | 3.958 to 56.564                                                                     |
| Index ranges                                | -10 ≤ h ≤ 10, -25 ≤ k ≤ 25, -14 ≤ l ≤ 16                                            |
| Reflections collected                       | 45049                                                                               |
| Independent reflections                     | 4620 [R <sub>int</sub> = 0.0546, R <sub>sigma</sub> = 0.0293]                       |
| Data/restraints/parameters                  | 4620/0/254                                                                          |
| Goodness-of-fit on F <sup>2</sup>           | 1.177                                                                               |
| Final R indexes [I ≥ 2σ (I)]                | R <sub>1</sub> = 0.0500, wR <sub>2</sub> = 0.0947                                   |
| Final R indexes [all data]                  | R <sub>1</sub> = 0.0599, wR <sub>2</sub> = 0.0979                                   |
| Largest diff. peak/hole / e Å <sup>-3</sup> | 0.71/-0.58                                                                          |

**Table S2. Fractional Atomic Coordinates ( $\times 10^4$ ) and Equivalent Isotropic Displacement Parameters ( $\text{\AA}^2 \times 10^3$ ) for  $[\text{CoL}_1\text{Cl}]\text{PF}_6$ .  $U_{\text{eq}}$  is defined as 1/3 of the trace of the orthogonalised  $U_{ij}$  tensor.**

| Atom | x          | y           | z           | U(eq)      |
|------|------------|-------------|-------------|------------|
| Co1  | 7559.8 (4) | 3257.5 (2)  | 1791.5 (3)  | 9.59 (9)   |
| Cl1  | 7886.4 (9) | 2667.3 (4)  | 222.6 (6)   | 18.47 (15) |
| P1   | 7320.0 (9) | 4334.7 (4)  | 6826.9 (6)  | 17.37 (16) |
| F4   | 9133 (2)   | 4511.5 (11) | 6440.1 (17) | 31.3 (5)   |
| O1   | 5183 (2)   | 3367.9 (11) | 1205.8 (17) | 17.9 (4)   |
| F2   | 7320 (3)   | 3611.1 (11) | 6189.7 (18) | 38.0 (5)   |
| F1   | 5531 (3)   | 4159.4 (11) | 7220 (2)    | 39.6 (5)   |
| O2   | 3528 (3)   | 3994.9 (11) | -53.6 (17)  | 20.8 (4)   |
| F5   | 7372 (3)   | 5042.4 (11) | 7491 (2)    | 46.7 (6)   |
| F6   | 8287 (3)   | 3960.1 (15) | 7894.4 (17) | 54.4 (8)   |
| N1   | 7967 (3)   | 4133.0 (12) | 1109 (2)    | 14.9 (5)   |
| N4   | 9976 (3)   | 3245.3 (12) | 2306.6 (18) | 12.1 (4)   |
| F3   | 6381 (3)   | 4687.8 (15) | 5757 (2)    | 55.9 (7)   |
| N2   | 7207 (3)   | 3755.2 (14) | 3103.9 (19) | 20.6 (5)   |
| N3   | 7326 (3)   | 2413.6 (14) | 2693 (2)    | 21.8 (6)   |
| C12  | 4935 (4)   | 3842.7 (15) | 455 (2)     | 15.6 (5)   |
| C10  | 10395 (3)  | 3669.7 (15) | 3342 (2)    | 16.2 (6)   |
| C9   | 8832 (4)   | 3763.5 (18) | 3922 (2)    | 22.2 (6)   |
| C6   | 10405 (4)  | 2500.9 (14) | 2519 (2)    | 16.6 (6)   |
| C7   | 10850 (3)  | 3549.7 (16) | 1409 (2)    | 17.3 (6)   |
| C5   | 9125 (4)   | 2213.4 (16) | 3199 (3)    | 22.4 (6)   |
| C11  | 6537 (4)   | 4204.3 (15) | 170 (2)     | 17.6 (6)   |
| C8   | 9730 (4)   | 4109.3 (16) | 770 (3)     | 20.5 (6)   |
| C1   | 7832 (4)   | 4697.9 (16) | 1938 (3)    | 26.3 (7)   |
| C3   | 5833 (4)   | 3365 (2)    | 3560 (3)    | 30.9 (8)   |
| C2   | 6672 (4)   | 4463.6 (17) | 2738 (3)    | 27.6 (7)   |
| C4   | 6267 (4)   | 2604 (2)    | 3587 (3)    | 35.4 (9)   |
| C13  | 6530 (5)   | 1809.0 (19) | 2066 (3)    | 37.4 (9)   |

**Table S3. Anisotropic Displacement Parameters ( $\text{\AA}^2 \times 10^3$ ) for  $[\text{CoL}_1\text{Cl}]\text{PF}_6$ . The Anisotropic displacement factor exponent takes the form:  $-2\pi^2[h^2a^{*2}U_{11}+2hka^*b^*U_{12}+\dots]$ .**

| Atom | $U_{11}$  | $U_{22}$   | $U_{33}$  | $U_{23}$   | $U_{13}$   | $U_{12}$   |
|------|-----------|------------|-----------|------------|------------|------------|
| Co1  | 8.29 (16) | 11.21 (17) | 9.08 (16) | 1.98 (14)  | 0.55 (12)  | 0.52 (13)  |
| Cl1  | 19.6 (3)  | 19.5 (3)   | 15.3 (3)  | -5.8 (3)   | -0.9 (2)   | 2.4 (3)    |
| P1   | 14.8 (3)  | 18.1 (4)   | 19.2 (4)  | -0.9 (3)   | 2.3 (3)    | -1.6 (3)   |
| F4   | 22.1 (9)  | 35.1 (11)  | 39.2 (12) | -14.0 (9)  | 12.9 (8)   | -8.9 (8)   |
| O1   | 14.2 (9)  | 21.2 (11)  | 18.5 (10) | 4.3 (8)    | 2.8 (8)    | 3.1 (8)    |
| F2   | 47.5 (13) | 28.3 (11)  | 43.1 (13) | -14.0 (10) | 23.2 (10)  | -12.2 (10) |
| F1   | 30.0 (11) | 32.7 (11)  | 61.6 (15) | -5.6 (10)  | 25.1 (10)  | -9.6 (9)   |
| O2   | 16.5 (10) | 25.5 (11)  | 19.2 (10) | -0.8 (9)   | -1.6 (8)   | 5.2 (8)    |
| F5   | 36.5 (12) | 31.8 (12)  | 77.7 (18) | -32.2 (12) | 28.0 (12)  | -12.8 (10) |
| F6   | 61.2 (16) | 85.3 (19)  | 19.1 (10) | 14.1 (11)  | 13.7 (10)  | 45.5 (15)  |
| N1   | 16.1 (11) | 11.2 (11)  | 16.2 (11) | 2.4 (9)    | -1.9 (9)   | -0.4 (9)   |
| N4   | 11.6 (10) | 12.8 (11)  | 11.6 (10) | 0.9 (9)    | 0.4 (8)    | 0.7 (9)    |
| F3   | 47.1 (14) | 72.3 (18)  | 44.3 (14) | 28.2 (13)  | -6.9 (11)  | 17.0 (13)  |
| N2   | 16.5 (12) | 34.4 (15)  | 10.8 (11) | -4.0 (11)  | 1.4 (9)    | 6.5 (11)   |
| N3   | 16.8 (12) | 24.7 (13)  | 22.7 (13) | 11.1 (11)  | -1.6 (10)  | -5.1 (10)  |
| C12  | 16.0 (13) | 15.8 (13)  | 14.4 (13) | -5.9 (10)  | 0.6 (10)   | 4.0 (10)   |
| C10  | 14.4 (13) | 18.9 (14)  | 13.7 (13) | -2.1 (11)  | -3.0 (10)  | -1.2 (11)  |
| C9   | 18.5 (14) | 34.9 (18)  | 12.1 (13) | -4.6 (12)  | -1.5 (11)  | 6.2 (13)   |
| C6   | 15.7 (13) | 14.0 (13)  | 18.5 (14) | 3.1 (11)   | -3.3 (11)  | 4.5 (10)   |
| C7   | 11.1 (12) | 25.4 (15)  | 15.7 (13) | 2.8 (11)   | 3.3 (10)   | -3.6 (11)  |
| C5   | 21.4 (15) | 18.8 (14)  | 25.3 (16) | 9.3 (12)   | -1.8 (12)  | -1.4 (12)  |
| C11  | 19.2 (14) | 15.8 (13)  | 16.6 (13) | 4.1 (11)   | -1.7 (11)  | 2.3 (11)   |
| C8   | 15.6 (13) | 24.2 (15)  | 21.2 (14) | 11.4 (12)  | 1.0 (11)   | -4.4 (12)  |
| C1   | 29.5 (17) | 13.7 (14)  | 31.0 (18) | -4.6 (13)  | -11.9 (14) | 3.4 (12)   |
| C3   | 17.3 (14) | 60 (2)     | 16.6 (15) | 4.7 (15)   | 7.8 (12)   | 2.1 (15)   |
| C2   | 27.2 (16) | 26.8 (17)  | 26.1 (17) | -12.8 (14) | -5.5 (13)  | 15.1 (14)  |
| C4   | 21.8 (16) | 59 (3)     | 26.2 (18) | 20.9 (17)  | 6.9 (13)   | -2.0 (16)  |
| C13  | 34.3 (19) | 26.3 (18)  | 46 (2)    | 14.4 (16)  | -12.8 (16) | -17.8 (15) |



**Table S4. Bond Lengths for [CoL<sub>1</sub>Cl]PF<sub>6</sub>.**

| Atom | Atom | Length/Å    | Atom | Atom | Length/Å  |
|------|------|-------------|------|------|-----------|
| Co1  | Cl1  | 2.2854 (7)  | N1   | C1   | 1.508 (4) |
| Co1  | O1   | 1.924 (2)   | N4   | C10  | 1.509 (3) |
| Co1  | N1   | 1.939 (2)   | N4   | C6   | 1.495 (3) |
| Co1  | N4   | 1.922 (2)   | N4   | C7   | 1.503 (3) |
| Co1  | N2   | 1.931 (2)   | N2   | C9   | 1.512 (4) |
| Co1  | N3   | 1.997 (3)   | N2   | C3   | 1.496 (4) |
| P1   | F4   | 1.6095 (19) | N2   | C2   | 1.486 (4) |
| P1   | F2   | 1.605 (2)   | N3   | C5   | 1.517 (4) |
| P1   | F1   | 1.594 (2)   | N3   | C4   | 1.518 (4) |
| P1   | F5   | 1.592 (2)   | N3   | C13  | 1.490 (4) |
| P1   | F6   | 1.593 (2)   | C12  | C11  | 1.530 (4) |
| P1   | F3   | 1.569 (2)   | C10  | C9   | 1.522 (4) |
| O1   | C12  | 1.296 (3)   | C6   | C5   | 1.508 (4) |
| O2   | C12  | 1.230 (3)   | C7   | C8   | 1.540 (4) |
| N1   | C11  | 1.500 (3)   | C1   | C2   | 1.507 (5) |
| N1   | C8   | 1.510 (4)   | C3   | C4   | 1.513 (6) |

**Table S5. Bond Angles for [CoL<sub>1</sub>Cl]PF<sub>6</sub>.**

| Atom | Atom | Atom | Angle/°     | Atom | Atom | Atom | Angle/°     |
|------|------|------|-------------|------|------|------|-------------|
| O1   | Co1  | Cl1  | 87.89 (7)   | C1   | N1   | Co1  | 108.14 (19) |
| O1   | Co1  | N1   | 87.43 (9)   | C1   | N1   | C8   | 111.4 (2)   |
| O1   | Co1  | N2   | 90.35 (10)  | C10  | N4   | Co1  | 110.94 (16) |
| O1   | Co1  | N3   | 97.77 (9)   | C6   | N4   | Co1  | 104.99 (16) |
| N1   | Co1  | Cl1  | 91.60 (7)   | C6   | N4   | C10  | 111.2 (2)   |
| N1   | Co1  | N3   | 171.70 (11) | C6   | N4   | C7   | 112.9 (2)   |
| N4   | Co1  | Cl1  | 92.52 (7)   | C7   | N4   | Co1  | 107.05 (16) |
| N4   | Co1  | O1   | 173.64 (9)  | C7   | N4   | C10  | 109.6 (2)   |
| N4   | Co1  | N1   | 86.22 (10)  | C9   | N2   | Co1  | 110.42 (18) |
| N4   | Co1  | N2   | 89.26 (10)  | C3   | N2   | Co1  | 105.0 (2)   |
| N4   | Co1  | N3   | 88.52 (10)  | C3   | N2   | C9   | 110.5 (2)   |
| N2   | Co1  | Cl1  | 178.21 (8)  | C2   | N2   | Co1  | 106.15 (18) |
| N2   | Co1  | N1   | 88.64 (11)  | C2   | N2   | C9   | 111.6 (3)   |

**Table S5. Bond Angles for [CoL<sub>1</sub>Cl]PF<sub>6</sub>.**

| Atom Atom Atom |     |     | Angle/°     | Atom Atom Atom |     |     | Angle/°     |
|----------------|-----|-----|-------------|----------------|-----|-----|-------------|
| N2             | Co1 | N3  | 84.87 (12)  | C2             | N2  | C3  | 112.9 (3)   |
| N3             | Co1 | Cl1 | 95.05 (8)   | C5             | N3  | Co1 | 106.27 (17) |
| F2             | P1  | F4  | 88.85 (11)  | C5             | N3  | C4  | 110.4 (2)   |
| F1             | P1  | F4  | 179.55 (14) | C4             | N3  | Co1 | 107.8 (2)   |
| F1             | P1  | F2  | 91.33 (11)  | C13            | N3  | Co1 | 115.0 (2)   |
| F5             | P1  | F4  | 90.52 (11)  | C13            | N3  | C5  | 108.1 (3)   |
| F5             | P1  | F2  | 177.99 (15) | C13            | N3  | C4  | 109.2 (3)   |
| F5             | P1  | F1  | 89.29 (12)  | O1             | C12 | C11 | 116.2 (2)   |
| F5             | P1  | F6  | 89.85 (15)  | O2             | C12 | O1  | 124.4 (3)   |
| F6             | P1  | F4  | 89.85 (13)  | O2             | C12 | C11 | 119.4 (3)   |
| F6             | P1  | F2  | 88.24 (14)  | N4             | C10 | C9  | 111.4 (2)   |
| F6             | P1  | F1  | 89.75 (14)  | N2             | C9  | C10 | 110.9 (2)   |
| F3             | P1  | F4  | 89.67 (13)  | N4             | C6  | C5  | 107.4 (2)   |
| F3             | P1  | F2  | 90.33 (15)  | N4             | C7  | C8  | 111.0 (2)   |
| F3             | P1  | F1  | 90.74 (14)  | C6             | C5  | N3  | 110.0 (2)   |
| F3             | P1  | F5  | 91.57 (16)  | N1             | C11 | C12 | 109.8 (2)   |
| F3             | P1  | F6  | 178.51 (15) | N1             | C8  | C7  | 111.5 (2)   |
| C12            | O1  | Co1 | 112.60 (18) | C2             | C1  | N1  | 109.3 (3)   |
| C11            | N1  | Co1 | 104.99 (17) | N2             | C3  | C4  | 109.1 (3)   |
| C11            | N1  | C8  | 114.4 (2)   | N2             | C2  | C1  | 107.5 (2)   |
| C11            | N1  | C1  | 109.4 (2)   | C3             | C4  | N3  | 111.5 (3)   |
| C8             | N1  | Co1 | 108.03 (17) |                |     |     |             |

**Table S6. Torsion Angles for [CoL<sub>1</sub>Cl]PF<sub>6</sub>.**

| A   | B  | C   | D   | Angle/°   | A   | B  | C   | D   | Angle/°    |
|-----|----|-----|-----|-----------|-----|----|-----|-----|------------|
| Co1 | O1 | C12 | O2  | 178.3 (2) | C10 | N4 | C7  | C8  | -87.7 (3)  |
| Co1 | O1 | C12 | C11 | 1.1 (3)   | C9  | N2 | C3  | C4  | -71.1 (3)  |
| Co1 | N1 | C11 | C12 | 30.8 (3)  | C9  | N2 | C2  | C1  | 75.7 (3)   |
| Co1 | N1 | C8  | C7  | -20.4 (3) | C6  | N4 | C10 | C9  | -95.3 (3)  |
| Co1 | N1 | C1  | C2  | -26.6 (3) | C6  | N4 | C7  | C8  | 147.7 (2)  |
| Co1 | N4 | C10 | C9  | 21.1 (3)  | C7  | N4 | C10 | C9  | 139.1 (2)  |
| Co1 | N4 | C6  | C5  | -49.1 (2) | C7  | N4 | C6  | C5  | -165.3 (2) |
| Co1 | N4 | C7  | C8  | 32.6 (3)  | C5  | N3 | C4  | C3  | 112.0 (3)  |
| Co1 | N2 | C9  | C10 | 24.4 (3)  | C11 | N1 | C8  | C7  | -136.9 (3) |
| Co1 | N2 | C3  | C4  | 47.9 (3)  | C11 | N1 | C1  | C2  | 87.2 (3)   |
| Co1 | N2 | C2  | C1  | -44.7 (3) | C8  | N1 | C11 | C12 | 149.0 (2)  |
| Co1 | N3 | C5  | C6  | -23.4 (3) | C8  | N1 | C1  | C2  | -145.2 (2) |

**Table S6. Torsion Angles for [CoL<sub>1</sub>Cl]PF<sub>6</sub>.**

| A   | B   | C   | D  | Angle/°   | A   | B  | C   | D   | Angle/°    |
|-----|-----|-----|----|-----------|-----|----|-----|-----|------------|
| Co1 | N3  | C4  | C3 | -3.7 (3)  | C1  | N1 | C11 | C12 | -85.1 (3)  |
| O1  | C12 | C11 | N1 | -22.3 (3) | C1  | N1 | C8  | C7  | 98.3 (3)   |
| O2  | C12 | C11 | N1 | 160.3 (2) | C3  | N2 | C9  | C10 | 140.1 (3)  |
| N1  | C1  | C2  | N2 | 47.3 (3)  | C3  | N2 | C2  | C1  | -159.2 (3) |
| N4  | C10 | C9  | N2 | -29.5 (3) | C2  | N2 | C9  | C10 | -93.5 (3)  |
| N4  | C6  | C5  | N3 | 48.4 (3)  | C2  | N2 | C3  | C4  | 163.1 (3)  |
| N4  | C7  | C8  | N1 | -7.9 (3)  | C4  | N3 | C5  | C6  | -140.0 (3) |
| N2  | C3  | C4  | N3 | -28.5 (4) | C13 | N3 | C5  | C6  | 100.6 (3)  |
| C10 | N4  | C6  | C5 | 71.0 (3)  | C13 | N3 | C4  | C3  | -129.3 (3) |

**Table S7. Hydrogen Atom Coordinates ( $\text{\AA} \times 10^4$ ) and Isotropic Displacement Parameters ( $\text{\AA}^2 \times 10^3$ ) for [CoL<sub>1</sub>Cl]PF<sub>6</sub>.**

| Atom | x        | y       | z       | U(eq) |
|------|----------|---------|---------|-------|
| H10A | 10823.88 | 4128.05 | 3151.88 | 19    |
| H10B | 11311.63 | 3438.11 | 3845.91 | 19    |
| H9A  | 8792.75  | 3387.83 | 4464.87 | 27    |
| H9B  | 8920.99  | 4207.83 | 4324.77 | 27    |
| H6A  | 11578.83 | 2455.17 | 2920.69 | 20    |
| H6B  | 10340.85 | 2246.74 | 1813.95 | 20    |
| H7A  | 11088.37 | 3179.95 | 894.78  | 21    |
| H7B  | 11955.95 | 3754.42 | 1734.56 | 21    |
| H5A  | 9365.84  | 2395.76 | 3958.9  | 27    |
| H5B  | 9224.31  | 1704.13 | 3233.45 | 27    |
| H11A | 6878.4   | 3995.98 | -501.73 | 21    |
| H11B | 6289.55  | 4699.24 | 22.61   | 21    |
| H8A  | 10287.97 | 4564.84 | 907.81  | 25    |
| H8B  | 9627.06  | 4013.03 | -29.33  | 25    |
| H1A  | 8980.6   | 4805.38 | 2338.77 | 32    |
| H1B  | 7366     | 5121.58 | 1555.09 | 32    |
| H3A  | 4718.94  | 3442.23 | 3092.91 | 37    |
| H3B  | 5742.16  | 3529.82 | 4312.72 | 37    |
| H2A  | 6769.66  | 4779.78 | 3378.15 | 33    |
| H2B  | 5467.44  | 4461.83 | 2377.75 | 33    |

**Table S7. Hydrogen Atom Coordinates ( $\text{\AA}\times 10^4$ ) and Isotropic Displacement Parameters ( $\text{\AA}^2\times 10^3$ ) for  $[\text{CoL}_1\text{Cl}]\text{PF}_6$ .**

| <b>Atom</b> | <b>x</b> | <b>y</b> | <b>z</b> | <b>U(eq)</b> |
|-------------|----------|----------|----------|--------------|
| H4A         | 5195.79  | 2330.97  | 3487.39  | 42           |
| H4B         | 6911.6   | 2485.83  | 4315.81  | 42           |
| H13A        | 5421.38  | 1944.51  | 1658.08  | 56           |
| H13B        | 6363.88  | 1435.73  | 2579     | 56           |
| H13C        | 7281.2   | 1649.31  | 1547.9   | 56           |

**Table S8. Crystal data and structure refinement for [CuL<sub>1</sub>]PF<sub>6</sub> .**

|                                             |                                                                                   |
|---------------------------------------------|-----------------------------------------------------------------------------------|
| Identification code                         | th70bp1                                                                           |
| Empirical formula                           | C <sub>13</sub> H <sub>25</sub> CuF <sub>6</sub> N <sub>4</sub> O <sub>2</sub> P  |
| Structural formula                          | C <sub>13</sub> H <sub>25</sub> N <sub>4</sub> O <sub>2</sub> Cu, PF <sub>6</sub> |
| Formula weight                              | 477.88                                                                            |
| Temperature/K                               | 120                                                                               |
| Crystal system                              | triclinic                                                                         |
| Space group                                 | P-1                                                                               |
| a/Å                                         | 8.2596(8)                                                                         |
| b/Å                                         | 8.7606(9)                                                                         |
| c/Å                                         | 13.0051(12)                                                                       |
| α/°                                         | 77.500(3)                                                                         |
| β/°                                         | 81.329(3)                                                                         |
| γ/°                                         | 87.627(3)                                                                         |
| Volume/Å <sup>3</sup>                       | 908.19(15)                                                                        |
| Z                                           | 2                                                                                 |
| ρ <sub>calc</sub> /g/cm <sup>3</sup>        | 1.748                                                                             |
| μ/mm <sup>-1</sup>                          | 1.367                                                                             |
| F(000)                                      | 490.0                                                                             |
| Crystal size/mm <sup>3</sup>                | 0.451 × 0.097 × 0.018                                                             |
| Radiation                                   | MoKα (λ = 0.71073 Å)                                                              |
| 2θ range for data collection/°              | 4.762 to 56.614                                                                   |
| Index ranges                                | -11 ≤ h ≤ 10, -11 ≤ k ≤ 11, -17 ≤ l ≤ 17                                          |
| Reflections collected                       | 24102                                                                             |
| Independent reflections                     | 4507 [R <sub>int</sub> = 0.0283, R <sub>sigma</sub> = 0.0217]                     |
| Data/restraints/parameters                  | 4507/0/245                                                                        |
| Goodness-of-fit on F <sup>2</sup>           | 1.029                                                                             |
| Final R indexes [I ≥ 2σ (I)]                | R <sub>1</sub> = 0.0238, wR <sub>2</sub> = 0.0551                                 |
| Final R indexes [all data]                  | R <sub>1</sub> = 0.0304, wR <sub>2</sub> = 0.0574                                 |
| Largest diff. peak/hole / e Å <sup>-3</sup> | 0.51/-0.33                                                                        |

**Table S9 Fractional Atomic Coordinates ( $\times 10^4$ ) and Equivalent Isotropic Displacement Parameters ( $\text{\AA}^2 \times 10^3$ ) for  $[\text{CuL}_1]\text{PF}_6$ .  $U_{\text{eq}}$  is defined as 1/3 of the trace of the orthogonalised  $U_{ij}$  tensor.**

| Atom | x           | y           | z           | U(eq)     |
|------|-------------|-------------|-------------|-----------|
| Cu1  | 2448.5 (2)  | 6898.7 (2)  | 3462.5 (2)  | 10.12 (5) |
| P1   | 2288.7 (5)  | 7403.2 (5)  | 8498.6 (3)  | 14.13 (9) |
| F1   | 2541.9 (13) | 6194.3 (11) | 7722.7 (8)  | 23.5 (2)  |
| F6   | 2053.9 (14) | 8623.5 (12) | 9269.7 (8)  | 27.4 (2)  |
| F4   | 2291.2 (14) | 5984.9 (12) | 9497.6 (8)  | 27.1 (2)  |
| F3   | 2301.3 (15) | 8830.0 (12) | 7492.6 (8)  | 29.3 (2)  |
| F2   | 351.6 (13)  | 7286.8 (14) | 8576.4 (9)  | 31.4 (3)  |
| O1   | 2354.6 (13) | 4953.8 (12) | 4537.6 (9)  | 14.7 (2)  |
| O2   | 956.7 (15)  | 2724.1 (13) | 5005.5 (10) | 21.6 (3)  |
| F5   | 4238.2 (13) | 7536.7 (12) | 8410.2 (10) | 32.5 (3)  |
| N3   | 3666.0 (16) | 8234.8 (15) | 4134.6 (10) | 13.6 (3)  |
| N2   | 4505.6 (16) | 7303.5 (15) | 2163.4 (10) | 13.8 (3)  |
| N1   | 1482.7 (15) | 5686.0 (14) | 2605.8 (10) | 10.9 (2)  |
| N4   | 1609.3 (16) | 8885.5 (14) | 2538.2 (10) | 12.8 (2)  |
| C8   | 503.4 (19)  | 6777.6 (17) | 1879.7 (12) | 13.1 (3)  |
| C12  | 1329.9 (19) | 3980.0 (17) | 4392.4 (13) | 14.3 (3)  |
| C11  | 493.4 (19)  | 4484.1 (17) | 3395.4 (12) | 13.8 (3)  |
| C6   | 1427 (2)    | 9892.4 (17) | 3330.8 (13) | 16.1 (3)  |
| C7   | 77.7 (18)   | 8263.6 (17) | 2313.3 (13) | 14.9 (3)  |
| C9   | 4492 (2)    | 8922.9 (18) | 1572.3 (13) | 17.4 (3)  |
| C1   | 2935.0 (18) | 4965.1 (17) | 2055.3 (12) | 13.9 (3)  |
| C13  | 3342 (2)    | 7803 (2)    | 5311.9 (13) | 20.2 (3)  |
| C4   | 5454.1 (19) | 7976.6 (19) | 3740.8 (13) | 17.7 (3)  |
| C3   | 5730.4 (19) | 6960.1 (19) | 2893.8 (13) | 17.9 (3)  |
| C5   | 3057 (2)    | 9886.8 (17) | 3760.5 (13) | 15.8 (3)  |
| C2   | 4271.7 (19) | 6161.5 (18) | 1513.5 (13) | 15.6 (3)  |
| C10  | 2725 (2)    | 9544.8 (18) | 1548.1 (13) | 16.7 (3)  |

**Table S10. Anisotropic Displacement Parameters ( $\text{\AA}^2 \times 10^3$ ) for  $[\text{CuL}_1]\text{PF}_6$ . The Anisotropic displacement factor exponent takes the form:  $-2\pi^2[h^2a^{*2}U_{11}+2hka^*b^*U_{12}+\dots]$ .**

| Atom | $U_{11}$  | $U_{22}$   | $U_{33}$  | $U_{23}$   | $U_{13}$   | $U_{12}$  |
|------|-----------|------------|-----------|------------|------------|-----------|
| Cu1  | 11.28 (9) | 9.21 (8)   | 10.46 (9) | -2.37 (6)  | -2.73 (6)  | -1.21 (6) |
| P1   | 17.0 (2)  | 13.59 (18) | 12.5 (2)  | -3.74 (14) | -2.95 (15) | 0.83 (14) |
| F1   | 34.6 (6)  | 19.2 (5)   | 20.2 (5)  | -10.3 (4)  | -7.3 (4)   | 3.8 (4)   |
| F6   | 42.7 (6)  | 22.3 (5)   | 20.9 (5)  | -11.9 (4)  | -7.8 (5)   | 6.3 (4)   |
| F4   | 42.4 (6)  | 20.2 (5)   | 17.2 (5)  | 1.0 (4)    | -7.3 (5)   | 2.0 (4)   |

**Table S10. Anisotropic Displacement Parameters ( $\text{\AA}^2 \times 10^3$ ) for  $[\text{CuL}_1]\text{PF}_6$ . The Anisotropic displacement factor exponent takes the form:  $-2\pi^2[h^2a^{*2}U_{11}+2hka^*b^*U_{12}+\dots]$ .**

| Atom | $U_{11}$ | $U_{22}$ | $U_{33}$ | $U_{23}$  | $U_{13}$ | $U_{12}$ |
|------|----------|----------|----------|-----------|----------|----------|
| F3   | 48.9 (7) | 17.8 (5) | 16.9 (5) | 0.4 (4)   | 1.2 (5)  | 7.8 (5)  |
| F2   | 16.8 (5) | 39.6 (6) | 39.3 (7) | -11.1 (5) | -5.8 (5) | 1.8 (4)  |
| O1   | 16.8 (5) | 13.4 (5) | 14.3 (5) | -2.2 (4)  | -4.4 (4) | -1.1 (4) |
| O2   | 25.8 (6) | 14.8 (5) | 22.2 (6) | 1.9 (5)   | -4.9 (5) | -4.8 (5) |
| F5   | 17.7 (5) | 25.4 (5) | 56.8 (8) | -13.8 (5) | -5.2 (5) | -2.6 (4) |
| N3   | 15.0 (6) | 13.1 (6) | 13.1 (6) | -3.1 (5)  | -2.8 (5) | -2.0 (5) |
| N2   | 13.1 (6) | 14.0 (6) | 14.6 (6) | -3.3 (5)  | -2.3 (5) | -1.5 (5) |
| N1   | 11.5 (6) | 10.6 (5) | 11.0 (6) | -3.0 (5)  | -1.9 (5) | 0.7 (4)  |
| N4   | 14.0 (6) | 11.0 (6) | 14.3 (6) | -3.4 (5)  | -3.8 (5) | 0.5 (5)  |
| C8   | 14.6 (7) | 13.2 (7) | 12.9 (7) | -3.5 (5)  | -5.5 (6) | 1.2 (5)  |
| C12  | 14.3 (7) | 13.0 (7) | 15.3 (8) | -4.2 (6)  | 0.1 (6)  | 1.2 (5)  |
| C11  | 14.4 (7) | 12.2 (7) | 15.2 (8) | -3.4 (6)  | -1.8 (6) | -3.7 (5) |
| C6   | 19.7 (8) | 11.5 (7) | 18.4 (8) | -5.9 (6)  | -3.5 (6) | 1.4 (6)  |
| C7   | 11.8 (7) | 15.0 (7) | 19.4 (8) | -4.9 (6)  | -6.2 (6) | 2.1 (5)  |
| C9   | 18.8 (8) | 16.5 (7) | 15.2 (8) | -1.3 (6)  | 1.4 (6)  | -3.9 (6) |
| C1   | 14.8 (7) | 12.7 (7) | 15.2 (7) | -5.8 (6)  | -1.8 (6) | 2.7 (5)  |
| C13  | 25.7 (9) | 23.7 (8) | 13.1 (8) | -5.4 (6)  | -4.6 (7) | -6.0 (7) |
| C4   | 13.1 (7) | 20.8 (8) | 21.1 (8) | -6.1 (6)  | -4.9 (6) | -2.5 (6) |
| C3   | 10.6 (7) | 22.6 (8) | 21.8 (8) | -7.2 (6)  | -3.1 (6) | 0.2 (6)  |
| C5   | 19.5 (8) | 11.1 (7) | 18.1 (8) | -5.4 (6)  | -3.1 (6) | -1.5 (6) |
| C2   | 14.8 (7) | 17.9 (7) | 15.2 (8) | -7.1 (6)  | -1.1 (6) | 0.8 (6)  |
| C10  | 21.0 (8) | 13.7 (7) | 14.3 (8) | 0.7 (6)   | -3.6 (6) | -1.6 (6) |

**Table S11. Bond Lengths for  $[\text{CuL}_1]\text{PF}_6$ .**

| Atom Atom | Length/ $\text{\AA}$ | Atom Atom | Length/ $\text{\AA}$ |
|-----------|----------------------|-----------|----------------------|
| Cu1 O1    | 1.9522 (11)          | N2 C9     | 1.4605 (19)          |
| Cu1 N3    | 1.9876 (13)          | N2 C3     | 1.469 (2)            |
| Cu1 N2    | 2.1891 (13)          | N2 C2     | 1.4778 (19)          |
| Cu1 N1    | 1.9640 (12)          | N1 C8     | 1.4953 (18)          |
| Cu1 N4    | 2.0495 (13)          | N1 C11    | 1.4769 (18)          |
| P1 F1     | 1.6013 (10)          | N1 C1     | 1.4914 (19)          |
| P1 F6     | 1.6045 (10)          | N4 C6     | 1.4830 (19)          |
| P1 F4     | 1.5917 (10)          | N4 C7     | 1.4900 (19)          |
| P1 F3     | 1.6010 (11)          | N4 C10    | 1.485 (2)            |
| P1 F2     | 1.5940 (11)          | C8 C7     | 1.535 (2)            |
| P1 F5     | 1.6043 (11)          | C12 C11   | 1.533 (2)            |

**Table S11. Bond Lengths for [CuL<sub>1</sub>]PF<sub>6</sub>.**

| Atom | Atom | Length/Å    | Atom | Atom | Length/Å  |
|------|------|-------------|------|------|-----------|
| O1   | C12  | 1.2874 (18) | C6   | C5   | 1.533 (2) |
| O2   | C12  | 1.2311 (19) | C9   | C10  | 1.539 (2) |
| N3   | C13  | 1.481 (2)   | C1   | C2   | 1.535 (2) |
| N3   | C4   | 1.513 (2)   | C4   | C3   | 1.546 (2) |
| N3   | C5   | 1.5144 (19) |      |      |           |

**Table S12. Bond Angles for [CuL<sub>1</sub>]PF<sub>6</sub>.**

| Atom | Atom | Atom | Angle/°     | Atom | Atom | Atom | Angle/°     |
|------|------|------|-------------|------|------|------|-------------|
| O1   | Cu1  | N3   | 100.26 (5)  | C9   | N2   | Cu1  | 110.33 (10) |
| O1   | Cu1  | N2   | 119.60 (5)  | C9   | N2   | C3   | 114.38 (12) |
| O1   | Cu1  | N1   | 85.39 (5)   | C9   | N2   | C2   | 113.12 (13) |
| O1   | Cu1  | N4   | 158.06 (5)  | C3   | N2   | Cu1  | 93.03 (9)   |
| N3   | Cu1  | N2   | 85.38 (5)   | C3   | N2   | C2   | 118.76 (12) |
| N3   | Cu1  | N4   | 88.88 (5)   | C2   | N2   | Cu1  | 104.42 (9)  |
| N1   | Cu1  | N3   | 171.41 (5)  | C8   | N1   | Cu1  | 108.29 (9)  |
| N1   | Cu1  | N2   | 86.20 (5)   | C11  | N1   | Cu1  | 104.55 (9)  |
| N1   | Cu1  | N4   | 88.09 (5)   | C11  | N1   | C8   | 113.88 (12) |
| N4   | Cu1  | N2   | 80.73 (5)   | C11  | N1   | C1   | 110.87 (11) |
| F1   | P1   | F6   | 179.36 (7)  | C1   | N1   | Cu1  | 103.45 (9)  |
| F1   | P1   | F5   | 89.74 (6)   | C1   | N1   | C8   | 114.71 (12) |
| F4   | P1   | F1   | 89.81 (6)   | C6   | N4   | Cu1  | 98.37 (9)   |
| F4   | P1   | F6   | 90.51 (6)   | C6   | N4   | C7   | 116.97 (12) |
| F4   | P1   | F3   | 179.56 (7)  | C6   | N4   | C10  | 113.29 (12) |
| F4   | P1   | F2   | 90.73 (6)   | C7   | N4   | Cu1  | 99.35 (9)   |
| F4   | P1   | F5   | 89.89 (6)   | C10  | N4   | Cu1  | 115.21 (9)  |
| F3   | P1   | F1   | 90.16 (6)   | C10  | N4   | C7   | 112.16 (12) |
| F3   | P1   | F6   | 89.53 (6)   | N1   | C8   | C7   | 109.63 (12) |
| F3   | P1   | F5   | 89.67 (6)   | O1   | C12  | C11  | 116.10 (13) |
| F2   | P1   | F1   | 90.31 (6)   | O2   | C12  | O1   | 124.74 (15) |
| F2   | P1   | F6   | 90.24 (6)   | O2   | C12  | C11  | 119.12 (14) |
| F2   | P1   | F3   | 89.72 (6)   | N1   | C11  | C12  | 109.89 (12) |
| F2   | P1   | F5   | 179.38 (7)  | N4   | C6   | C5   | 108.49 (12) |
| F5   | P1   | F6   | 89.70 (6)   | N4   | C7   | C8   | 108.63 (12) |
| C12  | O1   | Cu1  | 112.28 (10) | N2   | C9   | C10  | 110.74 (12) |
| C13  | N3   | Cu1  | 112.19 (10) | N1   | C1   | C2   | 112.54 (12) |
| C13  | N3   | C4   | 110.53 (12) | N3   | C4   | C3   | 113.58 (12) |
| C13  | N3   | C5   | 109.34 (12) | N2   | C3   | C4   | 111.56 (13) |



**Table S12. Bond Angles for [CuL<sub>1</sub>]PF<sub>6</sub>.**

| Atom Atom Atom |    |     | Angle/°     | Atom Atom Atom |     |    | Angle/°     |
|----------------|----|-----|-------------|----------------|-----|----|-------------|
| C4             | N3 | Cu1 | 105.02 (9)  | N3             | C5  | C6 | 111.24 (12) |
| C4             | N3 | C5  | 114.06 (12) | N2             | C2  | C1 | 112.82 (12) |
| C5             | N3 | Cu1 | 105.59 (9)  | N4             | C10 | C9 | 112.67 (12) |

**Table S13. Torsion Angles for [CuL<sub>1</sub>]PF<sub>6</sub>.**

| A   | B   | C   | D   | Angle/°     | A   | B  | C   | D   | Angle/°     |
|-----|-----|-----|-----|-------------|-----|----|-----|-----|-------------|
| Cu1 | O1  | C12 | O2  | 174.22 (13) | C8  | N1 | C1  | C2  | 68.06 (16)  |
| Cu1 | O1  | C12 | C11 | 3.60 (16)   | C11 | N1 | C8  | C7  | 95.52 (14)  |
| Cu1 | N3  | C4  | C3  | 6.12 (15)   | C11 | N1 | C1  | C2  | 161.23 (12) |
| Cu1 | N3  | C5  | C6  | 18.01 (15)  | C6  | N4 | C7  | C8  | 156.45 (13) |
| Cu1 | N2  | C9  | C10 | -33.31 (15) | C6  | N4 | C10 | C9  | 94.51 (15)  |
| Cu1 | N2  | C3  | C4  | -54.17 (12) | C7  | N4 | C6  | C5  | 158.55 (12) |
| Cu1 | N2  | C2  | C1  | -10.03 (14) | C7  | N4 | C10 | C9  | 130.37 (13) |
| Cu1 | N1  | C8  | C7  | -20.30 (14) | C9  | N2 | C3  | C4  | 59.79 (17)  |
| Cu1 | N1  | C11 | C12 | -34.32 (13) | C9  | N2 | C2  | C1  | 130.02 (14) |
| Cu1 | N1  | C1  | C2  | -49.66 (13) | C1  | N1 | C8  | C7  | 135.25 (13) |
| Cu1 | N4  | C6  | C5  | 53.53 (12)  | C1  | N1 | C11 | C12 | 76.54 (15)  |
| Cu1 | N4  | C7  | C8  | -52.02 (12) | C13 | N3 | C4  | C3  | 127.32 (14) |
| Cu1 | N4  | C10 | C9  | -17.69 (16) | C13 | N3 | C5  | C6  | 102.88 (15) |
| O1  | C12 | C11 | N1  | 21.70 (18)  | C4  | N3 | C5  | C6  | 132.80 (13) |
| O2  | C12 | C11 | N1  | 160.36 (14) | C3  | N2 | C9  | C10 | 136.59 (14) |
| N3  | C4  | C3  | N2  | 37.89 (18)  | C3  | N2 | C2  | C1  | 91.70 (16)  |
| N2  | C9  | C10 | N4  | 33.93 (18)  | C5  | N3 | C4  | C3  | 109.00 (15) |
| N1  | C8  | C7  | N4  | 50.97 (16)  | C2  | N2 | C9  | C10 | 83.24 (16)  |
| N1  | C1  | C2  | N2  | 40.50 (17)  | C2  | N2 | C3  | C4  | 162.43 (13) |
| N4  | C6  | C5  | N3  | -51.18 (17) | C10 | N4 | C6  | C5  | -68.61 (15) |
| C8  | N1  | C11 | C12 | 152.31 (12) | C10 | N4 | C7  | C8  | 70.21 (15)  |

**Table S14. Hydrogen Atom Coordinates ( $\text{\AA}\times 10^4$ ) and Isotropic Displacement Parameters ( $\text{\AA}^2\times 10^3$ ) for  $[\text{CuL}_1]\text{PF}_6$ .**

| Atom | <i>x</i> | <i>y</i> | <i>z</i> | U(eq) |
|------|----------|----------|----------|-------|
| H8A  | -515.46  | 6260.49  | 1827.4   | 16    |
| H8B  | 1141.74  | 7055.02  | 1158.22  | 16    |
| H11A | 369.85   | 3567.16  | 3083.68  | 17    |
| H11B | -611.87  | 4910.56  | 3590.11  | 17    |
| H6A  | 545.06   | 9489.43  | 3920.99  | 19    |
| H6B  | 1133.73  | 10972.13 | 2992.6   | 19    |
| H7A  | -420.27  | 9055.42  | 1783.5   | 18    |
| H7B  | -720.83  | 8018.68  | 2973.85  | 18    |
| H9A  | 5049.34  | 8986.4   | 835.03   | 21    |
| H9B  | 5100.88  | 9580.55  | 1911.58  | 21    |
| H1A  | 2579.84  | 4466.71  | 1513.15  | 17    |
| H1B  | 3398.05  | 4137.53  | 2580.62  | 17    |
| H13A | 2180.03  | 7975.31  | 5553.24  | 30    |
| H13B | 4009.64  | 8450.74  | 5609.42  | 30    |
| H13C | 3622.91  | 6698.61  | 5552.05  | 30    |
| H4A  | 6003.61  | 7467.34  | 4354.36  | 21    |
| H4B  | 5974.3   | 9004.83  | 3433.75  | 21    |
| H3A  | 6838.8   | 7156.06  | 2481.66  | 21    |
| H3B  | 5670.27  | 5841.64  | 3253.52  | 21    |
| H5A  | 3884.09  | 10463.17 | 3194.22  | 19    |
| H5B  | 2910.69  | 10430.96 | 4361.23  | 19    |
| H2A  | 5318.32  | 5599.99  | 1369.82  | 19    |
| H2B  | 3976.44  | 6730.14  | 821.26   | 19    |
| H10A | 2727.49  | 10698.04 | 1444.37  | 20    |
| H10B | 2305.19  | 9283.52  | 933.78   | 20    |

**Table S15. Crystal data and structure refinement for [CoL<sub>2</sub>Cl]PF<sub>6</sub>.**

|                                             |                                                                                     |
|---------------------------------------------|-------------------------------------------------------------------------------------|
| Identification code                         | th117bp21c                                                                          |
| Empirical formula                           | C <sub>15</sub> H <sub>29</sub> ClCoF <sub>6</sub> N <sub>4</sub> O <sub>2</sub> P  |
| Structural formula                          | C <sub>15</sub> H <sub>29</sub> N <sub>4</sub> O <sub>2</sub> CoCl, PF <sub>6</sub> |
| Formula weight                              | 536.77                                                                              |
| Temperature/K                               | 120                                                                                 |
| Crystal system                              | monoclinic                                                                          |
| Space group                                 | P2 <sub>1</sub> /c                                                                  |
| a/Å                                         | 8.6543(8)                                                                           |
| b/Å                                         | 12.5675(12)                                                                         |
| c/Å                                         | 18.5750(18)                                                                         |
| α/°                                         | 90                                                                                  |
| β/°                                         | 92.778(2)                                                                           |
| γ/°                                         | 90                                                                                  |
| Volume/Å <sup>3</sup>                       | 2017.9(3)                                                                           |
| Z                                           | 4                                                                                   |
| ρ <sub>calc</sub> /g/cm <sup>3</sup>        | 1.767                                                                               |
| μ/mm <sup>-1</sup>                          | 1.138                                                                               |
| F(000)                                      | 1104.0                                                                              |
| Crystal size/mm <sup>3</sup>                | 0.232 × 0.09 × 0.056                                                                |
| Radiation                                   | MoKα (λ = 0.71073Å)                                                                 |
| 2θ range for data collection/°              | 3.914 to 54.454                                                                     |
| Index ranges                                | -11 ≤ h ≤ 11, -15 ≤ k ≤ 16, -23 ≤ l ≤ 23                                            |
| Reflections collected                       | 41924                                                                               |
| Independent reflections                     | 4491 [R <sub>int</sub> = 0.0507, R <sub>sigma</sub> = 0.0317]                       |
| Data/restraints/parameters                  | 4491/0/272                                                                          |
| Goodness-of-fit on F <sup>2</sup>           | 1.097                                                                               |
| Final R indexes [I>=2σ (I)]                 | R <sub>1</sub> = 0.0681, wR <sub>2</sub> = 0.1693                                   |
| Final R indexes [all data]                  | R <sub>1</sub> = 0.0883, wR <sub>2</sub> = 0.1793                                   |
| Largest diff. peak/hole / e Å <sup>-3</sup> | 1.82/-1.43                                                                          |

**Table S16. Fractional Atomic Coordinates (×10<sup>4</sup>) and Equivalent Isotropic Displacement Parameters (Å<sup>2</sup>×10<sup>3</sup>) for [CoL<sub>2</sub>Cl]PF<sub>6</sub>. U<sub>eq</sub> is defined as 1/3 of the trace of the orthogonalised U<sub>ij</sub> tensor.**

| Atom | x           | y           | z           | U(eq)      |
|------|-------------|-------------|-------------|------------|
| Co1  | 7118.7 (6)  | 2076.4 (5)  | 6578.9 (3)  | 25.12 (19) |
| P1   | 8196.2 (15) | 6994.2 (10) | 5960.5 (6)  | 30.8 (3)   |
| F2   | 8757 (4)    | 6123 (2)    | 6541.6 (15) | 40.6 (7)   |

**Table S16. Fractional Atomic Coordinates ( $\times 10^4$ ) and Equivalent Isotropic Displacement Parameters ( $\text{\AA}^2 \times 10^3$ ) for  $[\text{CoL}_2\text{Cl}]\text{PF}_6$ .  $U_{\text{eq}}$  is defined as 1/3 of the trace of the orthogonalised  $U_{ij}$  tensor.**

| Atom | x           | y          | z           | U(eq)     |
|------|-------------|------------|-------------|-----------|
| F3   | 6493 (3)    | 6514 (3)   | 5955.5 (15) | 39.7 (7)  |
| F4   | 7792 (4)    | 7787 (2)   | 6594.4 (15) | 41.3 (7)  |
| F1   | 8596 (4)    | 6200 (3)   | 5324.1 (16) | 48.1 (8)  |
| O1   | 5154 (3)    | 1401 (3)   | 6480.8 (17) | 27.6 (7)  |
| F6   | 9905 (4)    | 7468 (3)   | 5963.9 (19) | 57.3 (10) |
| F5   | 7628 (5)    | 7854 (3)   | 5374.4 (17) | 53.2 (9)  |
| O2   | 4000 (4)    | -37 (3)    | 6035 (2)    | 40.4 (9)  |
| N2   | 6499 (5)    | 3006 (3)   | 5738 (2)    | 28.0 (8)  |
| N3   | 6309 (5)    | 3114 (3)   | 7313 (2)    | 32.6 (9)  |
| N1   | 7845 (5)    | 1034 (4)   | 5867 (2)    | 35.1 (10) |
| N4   | 9104 (5)    | 2830 (4)   | 6665 (2)    | 43.3 (12) |
| C14  | 5141 (6)    | 526 (4)    | 6139 (2)    | 31.0 (10) |
| C2   | 6458 (6)    | 2280 (4)   | 5095 (2)    | 35.7 (11) |
| C1   | 7801 (6)    | 1550 (5)   | 5146 (3)    | 37.6 (12) |
| C4   | 4625 (6)    | 4166 (4)   | 6408 (3)    | 41.1 (12) |
| C11  | 7689 (6)    | 3857 (4)   | 5679 (3)    | 38.5 (12) |
| C3   | 4917 (6)    | 3488 (4)   | 5753 (3)    | 35.1 (11) |
| C13  | 6667 (6)    | 158 (4)    | 5863 (3)    | 38.0 (12) |
| C15  | 6105 (7)    | 2600 (5)   | 8033 (3)    | 42.6 (13) |
| C5   | 4771 (6)    | 3574 (4)   | 7114 (3)    | 37.4 (12) |
| C6   | 7511 (6)    | 3957 (5)   | 7408 (3)    | 47.2 (15) |
| C7   | 9057 (6)    | 3432 (6)   | 7356 (3)    | 51.1 (16) |
| C12  | 9239 (6)    | 3578 (5)   | 6034 (3)    | 43.1 (14) |
| C10  | 9409 (6)    | 551 (6)    | 6011 (3)    | 51.9 (16) |
| C9   | 10685 (6)   | 1356 (7)   | 6112 (4)    | 64 (2)    |
| C8   | 10524 (6)   | 2113 (6)   | 6726 (3)    | 58.5 (19) |
| Cl1  | 7797.0 (17) | 808.2 (14) | 7430.4 (8)  | 51.9 (4)  |

**Table S17. Anisotropic Displacement Parameters ( $\text{\AA}^2 \times 10^3$ ) for  $[\text{CoL}_2\text{Cl}]\text{PF}_6$ . The Anisotropic displacement factor exponent takes the form:  $-2\pi^2[h^2a^{*2}U_{11}+2hka^*b^*U_{12}+\dots]$ .**

| Atom | U <sub>11</sub> | U <sub>22</sub> | U <sub>33</sub> | U <sub>23</sub> | U <sub>13</sub> | U <sub>12</sub> |
|------|-----------------|-----------------|-----------------|-----------------|-----------------|-----------------|
| Co1  | 17.8 (3)        | 42.2 (4)        | 15.5 (3)        | 0.7 (3)         | 2.9 (2)         | 0.0 (3)         |
| P1   | 38.4 (7)        | 32.2 (7)        | 22.1 (6)        | 4.0 (5)         | 4.4 (5)         | -5.0 (5)        |
| F2   | 46.4 (17)       | 41.9 (18)       | 33.5 (15)       | 10.0 (13)       | 2.2 (13)        | 3.9 (14)        |
| F3   | 36.5 (15)       | 47.9 (18)       | 34.9 (16)       | -1.0 (14)       | 2.6 (12)        | -6.5 (14)       |
| F4   | 59.6 (19)       | 35.8 (17)       | 28.5 (15)       | -3.1 (12)       | 1.2 (13)        | -0.6 (14)       |

**Table S17. Anisotropic Displacement Parameters ( $\text{\AA}^2 \times 10^3$ ) for  $[\text{CoL}_2\text{Cl}]\text{PF}_6$ . The Anisotropic displacement factor exponent takes the form:  $-2\pi^2[h^2a^{*2}U_{11}+2hka^*b^*U_{12}+\dots]$ .**

| Atom | $U_{11}$  | $U_{22}$  | $U_{33}$  | $U_{23}$  | $U_{13}$   | $U_{12}$   |
|------|-----------|-----------|-----------|-----------|------------|------------|
| F1   | 68 (2)    | 46.6 (19) | 30.8 (16) | -5.1 (14) | 20.3 (15)  | -1.5 (16)  |
| O1   | 25.1 (15) | 29.0 (17) | 28.8 (16) | -0.9 (13) | 2.9 (12)   | 1.9 (13)   |
| F6   | 50 (2)    | 75 (2)    | 48 (2)    | 4.0 (18)  | 10.3 (16)  | -26.7 (19) |
| F5   | 88 (3)    | 39.1 (18) | 31.5 (16) | 11.1 (14) | -11.0 (16) | -9.4 (18)  |
| O2   | 47 (2)    | 32 (2)    | 42 (2)    | 1.9 (16)  | 6.8 (16)   | -7.2 (17)  |
| N2   | 33 (2)    | 29 (2)    | 21.8 (18) | 0.1 (15)  | -2.8 (15)  | -3.9 (17)  |
| N3   | 29 (2)    | 41 (2)    | 28 (2)    | -7.4 (17) | 8.0 (16)   | -10.1 (17) |
| N1   | 34 (2)    | 45 (3)    | 27 (2)    | 8.0 (18)  | 11.1 (17)  | 11.5 (19)  |
| N4   | 21.5 (19) | 84 (4)    | 25 (2)    | 3 (2)     | 3.5 (16)   | -11 (2)    |
| C14  | 36 (2)    | 30 (3)    | 26 (2)    | 9 (2)     | 1.4 (19)   | 0 (2)      |
| C2   | 51 (3)    | 40 (3)    | 16 (2)    | 3.2 (19)  | -2 (2)     | 0 (2)      |
| C1   | 46 (3)    | 46 (3)    | 22 (2)    | 0 (2)     | 12 (2)     | -2 (2)     |
| C4   | 41 (3)    | 31 (3)    | 52 (3)    | -1 (2)    | 5 (2)      | 0 (2)      |
| C11  | 47 (3)    | 38 (3)    | 31 (3)    | 2 (2)     | 5 (2)      | -14 (2)    |
| C3   | 33 (2)    | 32 (3)    | 40 (3)    | 6 (2)     | -8 (2)     | 4 (2)      |
| C13  | 49 (3)    | 32 (3)    | 34 (3)    | 4 (2)     | 11 (2)     | 7 (2)      |
| C15  | 46 (3)    | 58 (4)    | 24 (2)    | -8 (2)    | 11 (2)     | -6 (3)     |
| C5   | 32 (2)    | 41 (3)    | 40 (3)    | -11 (2)   | 10 (2)     | -1 (2)     |
| C6   | 48 (3)    | 64 (4)    | 31 (3)    | -17 (3)   | 9 (2)      | -27 (3)    |
| C7   | 36 (3)    | 87 (5)    | 31 (3)    | -12 (3)   | 0 (2)      | -28 (3)    |
| C12  | 33 (3)    | 66 (4)    | 32 (3)    | -6 (3)    | 11 (2)     | -17 (3)    |
| C10  | 38 (3)    | 74 (4)    | 46 (3)    | 13 (3)    | 15 (2)     | 25 (3)     |
| C9   | 26 (3)    | 115 (6)   | 52 (4)    | 15 (4)    | 15 (2)     | 19 (3)     |
| C8   | 21 (2)    | 108 (6)   | 46 (3)    | 13 (4)    | -2 (2)     | -4 (3)     |
| Cl1  | 44.7 (7)  | 67.3 (10) | 43.5 (8)  | 4.6 (7)   | 1.5 (6)    | 4.2 (7)    |

**Table S18. Bond Lengths for  $[\text{CoL}_2\text{Cl}]\text{PF}_6$**

| Atom Atom | Length/ $\text{\AA}$ | Atom Atom | Length/ $\text{\AA}$ |
|-----------|----------------------|-----------|----------------------|
| Co1 O1    | 1.901 (3)            | N3 C15    | 1.504 (6)            |
| Co1 N2    | 2.002 (4)            | N3 C5     | 1.482 (7)            |
| Co1 N3    | 2.035 (4)            | N3 C6     | 1.489 (6)            |
| Co1 N1    | 1.986 (4)            | N1 C1     | 1.487 (6)            |
| Co1 N4    | 1.961 (4)            | N1 C13    | 1.500 (7)            |
| Co1 Cl1   | 2.3014 (17)          | N1 C10    | 1.495 (6)            |
| P1 F2     | 1.597 (3)            | N4 C7     | 1.492 (7)            |
| P1 F3     | 1.592 (3)            | N4 C12    | 1.512 (7)            |

**Table S18. Bond Lengths for [CoL<sub>2</sub>Cl]PF<sub>6</sub>**

| Atom Atom |     | Length/Å  | Atom Atom |     | Length/Å   |
|-----------|-----|-----------|-----------|-----|------------|
| P1        | F4  | 1.594 (3) | N4        | C8  | 1.524 (8)  |
| P1        | F1  | 1.598 (3) | C14       | C13 | 1.512 (7)  |
| P1        | F6  | 1.594 (3) | C2        | C1  | 1.480 (8)  |
| P1        | F5  | 1.595 (3) | C4        | C3  | 1.517 (7)  |
| O1        | C14 | 1.270 (6) | C4        | C5  | 1.508 (8)  |
| O2        | C14 | 1.222 (6) | C11       | C12 | 1.508 (8)  |
| N2        | C2  | 1.502 (6) | C6        | C7  | 1.499 (9)  |
| N2        | C11 | 1.492 (6) | C10       | C9  | 1.503 (10) |
| N2        | C3  | 1.498 (6) | C9        | C8  | 1.496 (10) |

**Table S19. Bond Angles for [CoL<sub>2</sub>Cl]PF<sub>6</sub>.**

| Atom Atom Atom |     |     | Angle/°     | Atom Atom Atom |     |     | Angle/°   |
|----------------|-----|-----|-------------|----------------|-----|-----|-----------|
| O1             | Co1 | N2  | 88.92 (15)  | C3             | N2  | C2  | 105.9 (4) |
| O1             | Co1 | N3  | 90.85 (15)  | C15            | N3  | Co1 | 112.3 (3) |
| O1             | Co1 | N1  | 87.26 (16)  | C5             | N3  | Co1 | 114.7 (3) |
| O1             | Co1 | N4  | 177.55 (18) | C5             | N3  | C15 | 104.2 (4) |
| O1             | Co1 | Cl1 | 87.36 (11)  | C5             | N3  | C6  | 111.5 (4) |
| N2             | Co1 | N3  | 93.48 (17)  | C6             | N3  | Co1 | 105.9 (3) |
| N2             | Co1 | Cl1 | 171.78 (12) | C6             | N3  | C15 | 108.2 (4) |
| N3             | Co1 | Cl1 | 93.90 (13)  | C1             | N1  | Co1 | 108.5 (3) |
| N1             | Co1 | N2  | 86.96 (16)  | C1             | N1  | C13 | 109.1 (4) |
| N1             | Co1 | N3  | 178.04 (17) | C1             | N1  | C10 | 108.8 (4) |
| N1             | Co1 | Cl1 | 85.55 (12)  | C13            | N1  | Co1 | 104.5 (3) |
| N4             | Co1 | N2  | 89.00 (18)  | C10            | N1  | Co1 | 117.5 (4) |
| N4             | Co1 | N3  | 87.97 (18)  | C10            | N1  | C13 | 108.2 (4) |
| N4             | Co1 | N1  | 93.94 (19)  | C7             | N4  | Co1 | 104.8 (3) |
| N4             | Co1 | Cl1 | 94.87 (15)  | C7             | N4  | C12 | 110.9 (5) |
| F2             | P1  | F1  | 90.12 (18)  | C7             | N4  | C8  | 106.9 (4) |
| F3             | P1  | F2  | 89.68 (17)  | C12            | N4  | Co1 | 109.7 (3) |
| F3             | P1  | F4  | 90.31 (17)  | C12            | N4  | C8  | 109.4 (4) |
| F3             | P1  | F1  | 89.56 (18)  | C8             | N4  | Co1 | 114.9 (4) |
| F3             | P1  | F6  | 179.6 (2)   | O1             | C14 | C13 | 116.6 (4) |
| F3             | P1  | F5  | 89.92 (19)  | O2             | C14 | O1  | 124.6 (5) |
| F4             | P1  | F2  | 89.99 (17)  | O2             | C14 | C13 | 118.8 (5) |
| F4             | P1  | F1  | 179.8 (2)   | C1             | C2  | N2  | 109.8 (4) |
| F4             | P1  | F6  | 90.0 (2)    | C2             | C1  | N1  | 108.3 (4) |
| F4             | P1  | F5  | 90.53 (18)  | C5             | C4  | C3  | 114.2 (4) |

**Table S19. Bond Angles for [CoL<sub>2</sub>Cl]PF<sub>6</sub>.**

| Atom Atom Atom |    |     | Angle/°     | Atom Atom Atom |     |     | Angle/°   |
|----------------|----|-----|-------------|----------------|-----|-----|-----------|
| F6             | P1 | F2  | 90.12 (19)  | N2             | C11 | C12 | 113.8 (4) |
| F6             | P1 | F1  | 90.1 (2)    | N2             | C3  | C4  | 115.4 (4) |
| F6             | P1 | F5  | 90.3 (2)    | N1             | C13 | C14 | 112.3 (4) |
| F5             | P1 | F2  | 179.35 (19) | N3             | C5  | C4  | 116.5 (4) |
| F5             | P1 | F1  | 89.36 (19)  | N3             | C6  | C7  | 107.4 (5) |
| C14            | O1 | Co1 | 114.9 (3)   | N4             | C7  | C6  | 109.9 (4) |
| C2             | N2 | Co1 | 105.1 (3)   | C11            | C12 | N4  | 112.5 (4) |
| C11            | N2 | Co1 | 108.4 (3)   | N1             | C10 | C9  | 113.7 (5) |
| C11            | N2 | C2  | 111.4 (4)   | C8             | C9  | C10 | 115.3 (5) |
| C11            | N2 | C3  | 110.3 (4)   | C9             | C8  | N4  | 115.0 (5) |
| C3             | N2 | Co1 | 115.6 (3)   |                |     |     |           |

**Table S20. Torsion Angles for [CoL<sub>2</sub>Cl]PF<sub>6</sub>.**

| A   | B   | C   | D   | Angle/°   | A   | B  | C   | D   | Angle/°    |
|-----|-----|-----|-----|-----------|-----|----|-----|-----|------------|
| Co1 | O1  | C14 | O2  | 178.2 (4) | C1  | N1 | C10 | C9  | 68.0 (6)   |
| Co1 | O1  | C14 | C13 | -0.2 (5)  | C11 | N2 | C2  | C1  | 75.7 (5)   |
| Co1 | N2  | C2  | C1  | -41.6 (4) | C11 | N2 | C3  | C4  | -65.7 (5)  |
| Co1 | N2  | C11 | C12 | 22.1 (5)  | C3  | N2 | C2  | C1  | -164.5 (4) |
| Co1 | N2  | C3  | C4  | 57.8 (5)  | C3  | N2 | C11 | C12 | 149.6 (4)  |
| Co1 | N3  | C5  | C4  | -57.7 (5) | C3  | C4 | C5  | N3  | 61.9 (6)   |
| Co1 | N3  | C6  | C7  | -35.8 (5) | C13 | N1 | C1  | C2  | 78.5 (5)   |
| Co1 | N1  | C1  | C2  | -34.8 (5) | C13 | N1 | C10 | C9  | -173.6 (5) |
| Co1 | N1  | C13 | C14 | 21.7 (5)  | C15 | N3 | C5  | C4  | 179.1 (4)  |
| Co1 | N1  | C10 | C9  | -55.7 (6) | C15 | N3 | C6  | C7  | 84.9 (5)   |
| Co1 | N4  | C7  | C6  | -44.4 (6) | C5  | N3 | C6  | C7  | -161.1 (4) |
| Co1 | N4  | C12 | C11 | 21.2 (6)  | C5  | C4 | C3  | N2  | -61.1 (6)  |
| Co1 | N4  | C8  | C9  | 58.1 (6)  | C6  | N3 | C5  | C4  | 62.6 (5)   |
| O1  | C14 | C13 | N1  | -15.6 (6) | C7  | N4 | C12 | C11 | -94.1 (5)  |
| O2  | C14 | C13 | N1  | 165.9 (4) | C7  | N4 | C8  | C9  | 174.0 (5)  |
| N2  | C2  | C1  | N1  | 51.5 (6)  | C12 | N4 | C7  | C6  | 74.0 (6)   |
| N2  | C11 | C12 | N4  | -29.1 (6) | C12 | N4 | C8  | C9  | -65.8 (7)  |
| N3  | C6  | C7  | N4  | 54.8 (6)  | C10 | N1 | C1  | C2  | -163.7 (5) |
| N1  | C10 | C9  | C8  | 60.3 (7)  | C10 | N1 | C13 | C14 | 147.6 (4)  |
| C2  | N2  | C11 | C12 | -93.1 (5) | C10 | C9 | C8  | N4  | -62.5 (8)  |
| C2  | N2  | C3  | C4  | 173.7 (4) | C8  | N4 | C7  | C6  | -166.7 (5) |
| C1  | N1  | C13 | C14 | -94.2 (5) | C8  | N4 | C12 | C11 | 148.1 (5)  |

**Table S21. Hydrogen Atom Coordinates ( $\text{\AA}\times 10^4$ ) and Isotropic Displacement Parameters ( $\text{\AA}^2\times 10^3$ ) for  $[\text{CoL}_2\text{Cl}]\text{PF}_6$ .**

| Atom | <i>x</i> | <i>y</i> | <i>z</i> | U(eq) |
|------|----------|----------|----------|-------|
| H2A  | 5486.15  | 1863.31  | 5075.85  | 43    |
| H2B  | 6487.34  | 2706.82  | 4648.17  | 43    |
| H1A  | 8768.94  | 1951.23  | 5083.19  | 45    |
| H1B  | 7699.06  | 1003.08  | 4762.42  | 45    |
| H4A  | 5367.8   | 4765.86  | 6425.2   | 49    |
| H4B  | 3571.01  | 4470.73  | 6351.47  | 49    |
| H11A | 7304.71  | 4516.32  | 5899.64  | 46    |
| H11B | 7826.16  | 4004.2   | 5161.99  | 46    |
| H3A  | 4144.72  | 2906.14  | 5726.58  | 42    |
| H3B  | 4742.83  | 3931.52  | 5315.95  | 42    |
| H13A | 7072.52  | -435.82  | 6166.46  | 46    |
| H13B | 6495.22  | -112.31  | 5364.5   | 46    |
| H15A | 5360.3   | 2014.47  | 7977.04  | 64    |
| H15B | 5718.81  | 3127.93  | 8368.42  | 64    |
| H15C | 7101.17  | 2322.27  | 8222.7   | 64    |
| H5A  | 4489.6   | 4066.05  | 7502.45  | 45    |
| H5B  | 4003.1   | 2989.04  | 7097.53  | 45    |
| H6A  | 7440.04  | 4303.66  | 7883.68  | 57    |
| H6B  | 7363.24  | 4505.72  | 7028.44  | 57    |
| H7A  | 9882.56  | 3978.01  | 7377.2   | 61    |
| H7B  | 9242.68  | 2940.11  | 7767.22  | 61    |
| H12A | 9761.05  | 4239.72  | 6203.81  | 52    |
| H12B | 9891.68  | 3242.99  | 5674.13  | 52    |
| H10A | 9642.3   | 78.74    | 5604.04  | 62    |
| H10B | 9384.66  | 105.42   | 6450.29  | 62    |
| H9A  | 11678.03 | 971.52   | 6186.25  | 77    |
| H9B  | 10738.48 | 1774.06  | 5662.29  | 77    |
| H8A  | 11458.87 | 2567.17  | 6765.71  | 70    |
| H8B  | 10488.94 | 1696.19  | 7177.53  | 70    |



**Table S22. Crystal data and structure refinement for [CuL<sub>2</sub>]PF<sub>6</sub>.**

|                                             |                                                                                   |
|---------------------------------------------|-----------------------------------------------------------------------------------|
| Identification code                         | TH19b - twin4a                                                                    |
| Empirical formula                           | C <sub>15</sub> H <sub>29</sub> CuF <sub>6</sub> N <sub>4</sub> O <sub>2</sub> P  |
| Formula weight                              | 505.93                                                                            |
| Structural formula                          | C <sub>15</sub> H <sub>29</sub> N <sub>4</sub> O <sub>2</sub> Cu, PF <sub>6</sub> |
| Temperature/K                               | 127                                                                               |
| Crystal system                              | monoclinic                                                                        |
| Space group                                 | P2 <sub>1</sub> /c                                                                |
| a/Å                                         | 9.5256(3)                                                                         |
| b/Å                                         | 8.0586(3)                                                                         |
| c/Å                                         | 25.2288(8)                                                                        |
| α/°                                         | 90                                                                                |
| β/°                                         | 99.776(2)                                                                         |
| γ/°                                         | 90                                                                                |
| Volume/Å <sup>3</sup>                       | 1908.52(11)                                                                       |
| Z                                           | 4                                                                                 |
| ρ <sub>calc</sub> /g/cm <sup>3</sup>        | 1.761                                                                             |
| μ/mm <sup>-1</sup>                          | 3.145                                                                             |
| F(000)                                      | 1044.0                                                                            |
| Crystal size/mm <sup>3</sup>                | 0.222 × 0.156 × 0.008                                                             |
| Radiation                                   | CuKα (λ = 1.54178 Å)                                                              |
| 2θ range for data collection/°              | 7.11 to 133.158                                                                   |
| Index ranges                                | -11 ≤ h ≤ 11, 0 ≤ k ≤ 9, 0 ≤ l ≤ 29                                               |
| Reflections collected                       | 3322                                                                              |
| Independent reflections                     | 3322 [R <sub>int</sub> = 0.0552, R <sub>sigma</sub> = 0.0424]                     |
| Data/restraints/parameters                  | 3322/0/264                                                                        |
| Goodness-of-fit on F <sup>2</sup>           | 1.070                                                                             |
| Final R indexes [I ≥ 2σ (I)]                | R <sub>1</sub> = 0.0417, wR <sub>2</sub> = 0.1008                                 |
| Final R indexes [all data]                  | R <sub>1</sub> = 0.0465, wR <sub>2</sub> = 0.1034                                 |
| Largest diff. peak/hole / e Å <sup>-3</sup> | 0.52/-0.38                                                                        |

**Table S23. Fractional Atomic Coordinates (×10<sup>4</sup>) and Equivalent Isotropic Displacement Parameters (Å<sup>2</sup>×10<sup>3</sup>) for [CuL<sub>2</sub>]PF<sub>6</sub>. U<sub>eq</sub> is defined as 1/3 of the trace of the orthogonalised U<sub>ij</sub> tensor.**

| Atom | x           | y           | z          | U(eq)      |
|------|-------------|-------------|------------|------------|
| Cu1  | 8415.5 (6)  | 1017.5 (6)  | 6581.1 (2) | 19.13 (15) |
| P1   | 2888.7 (10) | 5796.8 (10) | 5798.6 (3) | 21.5 (2)   |
| F6   | 2883 (3)    | 7678 (2)    | 5579.2 (9) | 31.1 (5)   |

**Table S23. Fractional Atomic Coordinates ( $\times 10^4$ ) and Equivalent Isotropic Displacement Parameters ( $\text{\AA}^2 \times 10^3$ ) for  $[\text{CuL}_2]\text{PF}_6$ .  $U_{\text{eq}}$  is defined as 1/3 of the trace of the orthogonalised  $U_{ij}$  tensor.**

| Atom | x         | y         | z           | U(eq)     |
|------|-----------|-----------|-------------|-----------|
| F5   | 1863 (3)  | 6342 (3)  | 6207.5 (10) | 34.8 (5)  |
| F3   | 2911 (3)  | 3926 (3)  | 6020.7 (10) | 35.9 (5)  |
| F2   | 1530 (3)  | 5385 (3)  | 5354.7 (10) | 35.3 (6)  |
| F4   | 4249 (3)  | 6209 (3)  | 6248.3 (10) | 33.7 (5)  |
| F1   | 3915 (3)  | 5269 (3)  | 5391.2 (10) | 38.6 (6)  |
| O1   | 9086 (3)  | -1055 (3) | 6926.1 (10) | 26.3 (6)  |
| O2   | 9113 (4)  | -2500 (3) | 7674.9 (11) | 35.0 (7)  |
| N1   | 8015 (4)  | 3351 (3)  | 6294.2 (12) | 21.5 (6)  |
| N2   | 9661 (4)  | 688 (4)   | 6002.5 (12) | 21.6 (6)  |
| N3   | 6430 (4)  | 290 (4)   | 6036.7 (13) | 24.6 (7)  |
| N4   | 7154 (4)  | 1237 (4)  | 7163.4 (13) | 26.0 (7)  |
| C1   | 9189 (4)  | 3680 (5)  | 5985.0 (15) | 25.1 (8)  |
| C5   | 6608 (5)  | -1196 (5) | 5703.1 (16) | 27.7 (8)  |
| C2   | 9428 (4)  | 2186 (4)  | 5648.7 (15) | 22.3 (7)  |
| C10  | 8115 (5)  | 4649 (4)  | 6725.8 (15) | 27.6 (8)  |
| C14  | 8681 (5)  | -1346 (4) | 7370.2 (14) | 26.6 (8)  |
| C15  | 11184 (4) | 590 (5)   | 6254.6 (15) | 26.3 (8)  |
| C4   | 7804 (5)  | -1083 (4) | 5377.1 (15) | 28.3 (8)  |
| C6   | 5481 (5)  | -123 (5)  | 6422.0 (16) | 32.7 (9)  |
| C12  | 5989 (4)  | 1768 (5)  | 5701.2 (15) | 27.8 (8)  |
| C7   | 5637 (4)  | 1106 (5)  | 6888.5 (16) | 30.0 (8)  |
| C3   | 9305 (4)  | -887 (5)  | 5692.4 (15) | 25.1 (8)  |
| C11  | 6584 (4)  | 3424 (5)  | 5947.4 (16) | 27.5 (8)  |
| C13  | 7554 (6)  | -199 (5)  | 7536.2 (17) | 35.6 (10) |
| C8   | 7408 (5)  | 2806 (5)  | 7480.9 (16) | 29.9 (9)  |
| C9   | 7150 (5)  | 4390 (5)  | 7144.4 (16) | 30.5 (9)  |

**Table S24. Anisotropic Displacement Parameters ( $\text{\AA}^2 \times 10^3$ ) for  $[\text{CuL}_2]\text{PF}_6$ . The Anisotropic displacement factor exponent takes the form:  $-2\pi^2[h^2a^{*2}U_{11}+2hka^*b^*U_{12}+\dots]$ .**

| Atom | U <sub>11</sub> | U <sub>22</sub> | U <sub>33</sub> | U <sub>23</sub> | U <sub>13</sub> | U <sub>12</sub> |
|------|-----------------|-----------------|-----------------|-----------------|-----------------|-----------------|
| Cu1  | 23.1 (3)        | 16.1 (2)        | 18.1 (2)        | 1.70 (17)       | 3.1 (2)         | 1.1 (2)         |
| P1   | 23.6 (4)        | 17.4 (4)        | 23.2 (4)        | 2.3 (3)         | 3.4 (4)         | 0.8 (4)         |
| F6   | 35.8 (13)       | 20.9 (10)       | 35.8 (11)       | 10.0 (8)        | 3.9 (11)        | 0.5 (10)        |
| F5   | 36.9 (13)       | 38.2 (13)       | 31.8 (12)       | 6.0 (9)         | 13.3 (11)       | 7.8 (11)        |
| F3   | 45.5 (14)       | 19.1 (10)       | 42.1 (13)       | 7.6 (9)         | 4.5 (12)        | 0.3 (12)        |
| F2   | 33.4 (13)       | 36.4 (13)       | 32.3 (13)       | 0.1 (10)        | -5.5 (11)       | -6.8 (11)       |

**Table S24. Anisotropic Displacement Parameters ( $\text{\AA}^2 \times 10^3$ ) for  $[\text{CuL}_2]\text{PF}_6$ . The Anisotropic displacement factor exponent takes the form:  $-2\pi^2[h^2a^{*2}U_{11}+2hka^*b^*U_{12}+\dots]$ .**

| Atom | $U_{11}$  | $U_{22}$  | $U_{33}$  | $U_{23}$  | $U_{13}$  | $U_{12}$   |
|------|-----------|-----------|-----------|-----------|-----------|------------|
| F4   | 33.2 (12) | 29.2 (12) | 34.6 (12) | 0.2 (9)   | -6.2 (10) | 1.0 (11)   |
| F1   | 39.1 (14) | 42.5 (14) | 37.5 (13) | 1.1 (11)  | 15.7 (11) | 11.6 (12)  |
| O1   | 35.4 (15) | 18.3 (12) | 24.7 (12) | 3.5 (9)   | 3.6 (11)  | 1.3 (11)   |
| O2   | 54 (2)    | 25.5 (13) | 25.3 (13) | 6.1 (10)  | 4.9 (14)  | 0.4 (14)   |
| N1   | 28.1 (17) | 14.7 (13) | 21.2 (13) | -1.1 (10) | 3.2 (13)  | 1.1 (13)   |
| N2   | 26.4 (15) | 18.8 (15) | 19.8 (14) | 0.1 (11)  | 4.5 (12)  | 5.2 (13)   |
| N3   | 24.4 (16) | 26.4 (16) | 22.4 (15) | -3.5 (12) | 2.5 (12)  | -4.2 (13)  |
| N4   | 31.1 (17) | 22.3 (16) | 25.3 (16) | -0.9 (12) | 7.1 (13)  | -1.3 (15)  |
| C1   | 27.8 (19) | 21.6 (18) | 26.6 (18) | 2.2 (14)  | 6.3 (16)  | -1.6 (15)  |
| C5   | 32 (2)    | 22.5 (18) | 27.8 (19) | -5.9 (14) | 2.2 (16)  | -6.4 (17)  |
| C2   | 27.1 (19) | 19.5 (17) | 20.2 (16) | 3.3 (13)  | 3.9 (15)  | 1.5 (15)   |
| C10  | 37 (2)    | 16.9 (16) | 28.5 (17) | -5.0 (13) | 5.1 (17)  | -1.5 (17)  |
| C14  | 35 (2)    | 20.1 (16) | 22.8 (16) | -0.2 (13) | 0.6 (16)  | -7.4 (17)  |
| C15  | 24.3 (18) | 27.5 (19) | 26.6 (18) | 1.8 (14)  | 2.9 (15)  | 6.6 (15)   |
| C4   | 37 (2)    | 20.8 (17) | 25.4 (17) | -4.4 (13) | 1.4 (16)  | -3.0 (19)  |
| C6   | 30 (2)    | 36 (2)    | 32.9 (19) | -9.5 (16) | 8.4 (17)  | -10.2 (18) |
| C12  | 22.5 (19) | 33 (2)    | 25.7 (18) | -5.0 (14) | -3.3 (15) | 2.3 (16)   |
| C7   | 24 (2)    | 33 (2)    | 34 (2)    | -5.5 (16) | 7.6 (16)  | -3.4 (18)  |
| C3   | 32 (2)    | 18.1 (17) | 25.7 (18) | -2.9 (13) | 6.1 (16)  | 3.0 (16)   |
| C11  | 27 (2)    | 25 (2)    | 29 (2)    | 4.8 (14)  | 1.6 (17)  | 7.6 (16)   |
| C13  | 49 (3)    | 33 (2)    | 27.6 (19) | 7.9 (16)  | 16.2 (19) | 4 (2)      |
| C8   | 35 (2)    | 32 (2)    | 23.1 (17) | -6.4 (15) | 6.9 (17)  | -0.6 (18)  |
| C9   | 39 (2)    | 22.6 (19) | 29.7 (19) | -5.7 (14) | 5.7 (17)  | 1.4 (18)   |

**Table S25. Bond Lengths for  $[\text{CuL}_2]\text{PF}_6$ .**

| Atom Atom | Length/ $\text{\AA}$ | Atom Atom | Length/ $\text{\AA}$ |
|-----------|----------------------|-----------|----------------------|
| Cu1 O1    | 1.941 (3)            | N2 C15    | 1.483 (5)            |
| Cu1 N1    | 2.028 (3)            | N2 C3     | 1.500 (5)            |
| Cu1 N2    | 2.049 (3)            | N3 C5     | 1.490 (5)            |
| Cu1 N3    | 2.219 (3)            | N3 C6     | 1.473 (5)            |
| Cu1 N4    | 2.057 (3)            | N3 C12    | 1.480 (5)            |
| P1 F6     | 1.613 (2)            | N4 C7     | 1.497 (5)            |
| P1 F5     | 1.598 (3)            | N4 C13    | 1.499 (5)            |
| P1 F3     | 1.607 (2)            | N4 C8     | 1.494 (5)            |
| P1 F2     | 1.596 (3)            | C1 C2     | 1.512 (5)            |
| P1 F4     | 1.605 (2)            | C5 C4     | 1.517 (6)            |

**Table S25. Bond Lengths for [CuL<sub>2</sub>]PF<sub>6</sub>.**

| Atom | Atom | Length/Å  | Atom | Atom | Length/Å  |
|------|------|-----------|------|------|-----------|
| P1   | F1   | 1.592 (3) | C10  | C9   | 1.527 (6) |
| O1   | C14  | 1.267 (5) | C14  | C13  | 1.528 (6) |
| O2   | C14  | 1.232 (5) | C4   | C3   | 1.522 (6) |
| N1   | C1   | 1.492 (5) | C6   | C7   | 1.526 (5) |
| N1   | C10  | 1.501 (4) | C12  | C11  | 1.539 (6) |
| N1   | C11  | 1.490 (5) | C8   | C9   | 1.529 (6) |
| N2   | C2   | 1.496 (4) |      |      |           |

**Table S26. Bond Angles for [CuL<sub>2</sub>]PF<sub>6</sub>.**

| Atom | Atom | Atom | Angle/°     | Atom | Atom | Atom | Angle/°   |
|------|------|------|-------------|------|------|------|-----------|
| O1   | Cu1  | N1   | 170.34 (13) | C2   | N2   | C3   | 112.0 (3) |
| O1   | Cu1  | N2   | 91.23 (12)  | C15  | N2   | Cu1  | 110.1 (2) |
| O1   | Cu1  | N3   | 103.38 (12) | C15  | N2   | C2   | 109.5 (3) |
| O1   | Cu1  | N4   | 86.65 (12)  | C15  | N2   | C3   | 107.3 (3) |
| N1   | Cu1  | N2   | 87.86 (13)  | C3   | N2   | Cu1  | 112.0 (2) |
| N1   | Cu1  | N3   | 86.27 (13)  | C5   | N3   | Cu1  | 113.3 (2) |
| N1   | Cu1  | N4   | 94.46 (13)  | C6   | N3   | Cu1  | 101.8 (2) |
| N2   | Cu1  | N3   | 93.48 (12)  | C6   | N3   | C5   | 109.4 (3) |
| N2   | Cu1  | N4   | 177.48 (12) | C6   | N3   | C12  | 114.4 (3) |
| N4   | Cu1  | N3   | 85.69 (13)  | C12  | N3   | Cu1  | 105.7 (2) |
| F5   | P1   | F6   | 89.77 (13)  | C12  | N3   | C5   | 111.9 (3) |
| F5   | P1   | F3   | 90.35 (14)  | C7   | N4   | Cu1  | 107.3 (2) |
| F5   | P1   | F4   | 89.71 (13)  | C7   | N4   | C13  | 111.0 (3) |
| F3   | P1   | F6   | 179.41 (16) | C13  | N4   | Cu1  | 105.3 (3) |
| F2   | P1   | F6   | 89.97 (13)  | C8   | N4   | Cu1  | 113.2 (3) |
| F2   | P1   | F5   | 89.91 (15)  | C8   | N4   | C7   | 111.3 (3) |
| F2   | P1   | F3   | 90.61 (13)  | C8   | N4   | C13  | 108.4 (3) |
| F2   | P1   | F4   | 179.59 (15) | N1   | C1   | C2   | 110.5 (3) |
| F4   | P1   | F6   | 90.18 (13)  | N3   | C5   | C4   | 115.2 (3) |
| F4   | P1   | F3   | 89.24 (13)  | N2   | C2   | C1   | 109.2 (3) |
| F1   | P1   | F6   | 89.80 (14)  | N1   | C10  | C9   | 115.8 (3) |
| F1   | P1   | F5   | 179.52 (16) | O1   | C14  | C13  | 117.6 (3) |
| F1   | P1   | F3   | 90.07 (14)  | O2   | C14  | O1   | 124.9 (4) |
| F1   | P1   | F2   | 90.30 (14)  | O2   | C14  | C13  | 117.5 (4) |
| F1   | P1   | F4   | 90.07 (15)  | C5   | C4   | C3   | 116.6 (3) |
| C14  | O1   | Cu1  | 115.4 (2)   | N3   | C6   | C7   | 111.8 (3) |
| C1   | N1   | Cu1  | 103.8 (2)   | N3   | C12  | C11  | 114.7 (3) |

**Table S26. Bond Angles for [CuL<sub>2</sub>]PF<sub>6</sub>.**

| Atom Atom Atom |    |     | Angle/°   | Atom Atom Atom |     |     | Angle/°   |
|----------------|----|-----|-----------|----------------|-----|-----|-----------|
| C1             | N1 | C10 | 107.1 (3) | N4             | C7  | C6  | 111.3 (3) |
| C10            | N1 | Cu1 | 113.7 (2) | N2             | C3  | C4  | 118.0 (3) |
| C11            | N1 | Cu1 | 110.1 (2) | N1             | C11 | C12 | 116.1 (3) |
| C11            | N1 | C1  | 112.2 (3) | N4             | C13 | C14 | 114.2 (3) |
| C11            | N1 | C10 | 109.7 (3) | N4             | C8  | C9  | 114.4 (3) |
| C2             | N2 | Cu1 | 106.0 (2) | C10            | C9  | C8  | 116.0 (4) |

**Table S27. Torsion Angles for [CuL<sub>2</sub>]PF<sub>6</sub>.**

| A   | B   | C   | D   | Angle/°    | A   | B  | C   | D   | Angle/°    |
|-----|-----|-----|-----|------------|-----|----|-----|-----|------------|
| Cu1 | O1  | C14 | O2  | -172.0 (3) | C1  | N1 | C11 | C12 | 92.3 (4)   |
| Cu1 | O1  | C14 | C13 | 9.1 (5)    | C5  | N3 | C6  | C7  | 161.1 (3)  |
| Cu1 | N1  | C1  | C2  | 43.6 (3)   | C5  | N3 | C12 | C11 | -146.1 (3) |
| Cu1 | N1  | C10 | C9  | -57.0 (4)  | C5  | C4 | C3  | N2  | -66.2 (4)  |
| Cu1 | N1  | C11 | C12 | -22.8 (4)  | C2  | N2 | C3  | C4  | -57.9 (4)  |
| Cu1 | N2  | C2  | C1  | 33.8 (3)   | C10 | N1 | C1  | C2  | 164.2 (3)  |
| Cu1 | N2  | C3  | C4  | 61.0 (4)   | C10 | N1 | C11 | C12 | -148.7 (3) |
| Cu1 | N3  | C5  | C4  | -54.0 (4)  | C15 | N2 | C2  | C1  | -84.9 (4)  |
| Cu1 | N3  | C6  | C7  | 41.0 (4)   | C15 | N2 | C3  | C4  | -178.1 (3) |
| Cu1 | N3  | C12 | C11 | -22.4 (4)  | C6  | N3 | C5  | C4  | -166.9 (3) |
| Cu1 | N4  | C7  | C6  | 35.7 (4)   | C6  | N3 | C12 | C11 | 88.8 (4)   |
| Cu1 | N4  | C13 | C14 | -1.5 (4)   | C12 | N3 | C5  | C4  | 65.3 (4)   |
| Cu1 | N4  | C8  | C9  | 59.2 (4)   | C12 | N3 | C6  | C7  | -72.5 (4)  |
| O1  | C14 | C13 | N4  | -4.8 (6)   | C7  | N4 | C13 | C14 | 114.3 (4)  |
| O2  | C14 | C13 | N4  | 176.2 (4)  | C7  | N4 | C8  | C9  | -61.9 (5)  |
| N1  | C1  | C2  | N2  | -53.9 (4)  | C3  | N2 | C2  | C1  | 156.2 (3)  |
| N1  | C10 | C9  | C8  | 61.6 (5)   | C11 | N1 | C1  | C2  | -75.3 (4)  |
| N3  | C5  | C4  | C3  | 61.8 (4)   | C11 | N1 | C10 | C9  | 66.9 (4)   |
| N3  | C6  | C7  | N4  | -54.9 (5)  | C13 | N4 | C7  | C6  | -79.0 (4)  |
| N3  | C12 | C11 | N1  | 31.7 (5)   | C13 | N4 | C8  | C9  | 175.7 (4)  |
| N4  | C8  | C9  | C10 | -62.8 (5)  | C8  | N4 | C7  | C6  | 160.1 (3)  |
| C1  | N1  | C10 | C9  | -171.1 (3) | C8  | N4 | C13 | C14 | -123.0 (4) |

**Table S28. Hydrogen Atom Coordinates ( $\text{\AA}\times 10^4$ ) and Isotropic Displacement Parameters ( $\text{\AA}^2\times 10^3$ ) for  $[\text{CuL}_2]\text{PF}_6$ .**

| Atom | x        | y        | z       | U(eq) |
|------|----------|----------|---------|-------|
| H1A  | 10076.48 | 3937.81  | 6237.49 | 30    |
| H1B  | 8943.51  | 4653.54  | 5748.08 | 30    |
| H5A  | 5703.09  | -1390.86 | 5453.18 | 33    |
| H5B  | 6781.26  | -2173.16 | 5943.23 | 33    |
| H2A  | 8588.66  | 2013.53  | 5363.93 | 27    |
| H2B  | 10269.84 | 2373.25  | 5473.88 | 27    |
| H10A | 7885.84  | 5739.27  | 6551.84 | 33    |
| H10B | 9113.88  | 4697.89  | 6914.74 | 33    |
| H15A | 11456.72 | 1610.06  | 6457.81 | 40    |
| H15B | 11771.91 | 461.15   | 5974.09 | 40    |
| H15C | 11327.86 | -364.22  | 6498.4  | 40    |
| H4A  | 7606.55  | -128.63  | 5128.46 | 34    |
| H4B  | 7779.91  | -2096.85 | 5154.28 | 34    |
| H6A  | 5705.97  | -1253.83 | 6565.06 | 39    |
| H6B  | 4481.32  | -121.1   | 6233.16 | 39    |
| H12A | 4935.27  | 1829.14  | 5634.28 | 33    |
| H12B | 6299.45  | 1622.48  | 5349.06 | 33    |
| H7A  | 5295.77  | 2211.2   | 6751.59 | 36    |
| H7B  | 5037.77  | 740.41   | 7151.23 | 36    |
| H3A  | 9484.73  | -1824.12 | 5948.77 | 30    |
| H3B  | 9979.46  | -1003.29 | 5436.33 | 30    |
| H11A | 6633.34  | 4213.01  | 5650.42 | 33    |
| H11B | 5899.33  | 3881.03  | 6163.83 | 33    |
| H13A | 6687.49  | -857.15  | 7556.35 | 43    |
| H13B | 7914.41  | 236.71   | 7900.86 | 43    |
| H8A  | 8404.62  | 2810.16  | 7673.37 | 36    |
| H8B  | 6777.43  | 2818.09  | 7754.86 | 36    |
| H9A  | 6149.08  | 4385.37  | 6956.73 | 37    |
| H9B  | 7265.24  | 5352.22  | 7391.83 | 37    |
